# Supplementary material for: A computational approach to identify phytochemicals as potential inhibitor of acetylcholinesterase: Molecular docking, ADME profiling and molecular dynamics simulations
Source: PubMed Central journal article supplement (PMC11149856; doi:10.1371/journal.pone.0304490), 2024-06-04

# PLOS ONE

## A Computational Approach to Identify Phytochemicals as an inhibitor of Acetylcholinesterase: Molecular Docking, ADME profiling and Molecular Dynamics Simulations

--Manuscript Draft--

|                                                                                      |                                                                                                                                                                                                                                                                                                                                                                                                                                                                                                                                                                                                                                                                                                                                                                                                                                                                                                                                                                                                                                                                                                                                                                                                                                                                                                                                                                                                                                                                                                                                                                                                                                                                                                                                                                                                                                                                                                                                        |
|--------------------------------------------------------------------------------------|----------------------------------------------------------------------------------------------------------------------------------------------------------------------------------------------------------------------------------------------------------------------------------------------------------------------------------------------------------------------------------------------------------------------------------------------------------------------------------------------------------------------------------------------------------------------------------------------------------------------------------------------------------------------------------------------------------------------------------------------------------------------------------------------------------------------------------------------------------------------------------------------------------------------------------------------------------------------------------------------------------------------------------------------------------------------------------------------------------------------------------------------------------------------------------------------------------------------------------------------------------------------------------------------------------------------------------------------------------------------------------------------------------------------------------------------------------------------------------------------------------------------------------------------------------------------------------------------------------------------------------------------------------------------------------------------------------------------------------------------------------------------------------------------------------------------------------------------------------------------------------------------------------------------------------------|
| <b>Manuscript Number:</b>                                                            | PONE-D-24-10565                                                                                                                                                                                                                                                                                                                                                                                                                                                                                                                                                                                                                                                                                                                                                                                                                                                                                                                                                                                                                                                                                                                                                                                                                                                                                                                                                                                                                                                                                                                                                                                                                                                                                                                                                                                                                                                                                                                        |
| <b>Article Type:</b>                                                                 | Research Article                                                                                                                                                                                                                                                                                                                                                                                                                                                                                                                                                                                                                                                                                                                                                                                                                                                                                                                                                                                                                                                                                                                                                                                                                                                                                                                                                                                                                                                                                                                                                                                                                                                                                                                                                                                                                                                                                                                       |
| <b>Full Title:</b>                                                                   | A Computational Approach to Identify Phytochemicals as an inhibitor of Acetylcholinesterase: Molecular Docking, ADME profiling and Molecular Dynamics Simulations                                                                                                                                                                                                                                                                                                                                                                                                                                                                                                                                                                                                                                                                                                                                                                                                                                                                                                                                                                                                                                                                                                                                                                                                                                                                                                                                                                                                                                                                                                                                                                                                                                                                                                                                                                      |
| <b>Short Title:</b>                                                                  | Identification of Phytochemicals as an inhibitor of Acetylcholinesterase                                                                                                                                                                                                                                                                                                                                                                                                                                                                                                                                                                                                                                                                                                                                                                                                                                                                                                                                                                                                                                                                                                                                                                                                                                                                                                                                                                                                                                                                                                                                                                                                                                                                                                                                                                                                                                                               |
| <b>Corresponding Author:</b>                                                         | Ajit Ghosh<br>Shahjalal University of Science and Technology<br>Sylhet, Sylhet BANGLADESH                                                                                                                                                                                                                                                                                                                                                                                                                                                                                                                                                                                                                                                                                                                                                                                                                                                                                                                                                                                                                                                                                                                                                                                                                                                                                                                                                                                                                                                                                                                                                                                                                                                                                                                                                                                                                                              |
| <b>Keywords:</b>                                                                     | Alzheimer's disease, Acetylcholinesterase, Phytochemicals, Molecular docking, Molecular dynamic simulation.                                                                                                                                                                                                                                                                                                                                                                                                                                                                                                                                                                                                                                                                                                                                                                                                                                                                                                                                                                                                                                                                                                                                                                                                                                                                                                                                                                                                                                                                                                                                                                                                                                                                                                                                                                                                                            |
| <b>Abstract:</b>                                                                     | Inhibition of acetylcholinesterase (AChE) is a crucial target in the treatment of Alzheimer's disease (AD). Common anti-acetylcholinesterase drugs such as galantamine, rivastigmine, donepezil, and tacrine have significant inhibition potential. Due to side effects and safety concerns, we aimed to investigate a wide range of phytochemicals and structural analogues of these compounds. Compounds similar to established drugs, and phytochemicals were investigated as potential inhibitors for AChE in treating AD. A total of 2,270 compound libraries were generated for further analysis. Initial virtual screening was performed using Pyrx software, resulting in 638 molecules showing higher binding affinities compared to positive controls Tacrine (-9.0 kcal/mol), Donepezil (-7.3 kcal/mol), Galantamine (-8.3 kcal/mol), and Rivastigmine (-6.4 kcal/mol). Subsequently, ADME properties were assessed, including blood-brain barrier permeability and Lipinski's rule of five violations, leading to 88 compounds passing the ADME analysis. Among the rivastigmine analogous, [3-(1-methylpiperidin-2-yl)phenyl] N,N-diethylcarbamate showed interaction with Tyr123, Tyr336, Tyr340, Phe337, Trp285 residues of AChE. Tacrine similar compounds, such as 4-amino-2-styrylquinoline, exhibited bindings with Tyr123, Phe337, Tyr336, Trp285, Trp85, Gly119, and Gly120 residues. A phytocompound bisdemethoxycurcumin showed interaction with Trp285, Tyr340, Trp85, Tyr71, and His446 residues of AChE with favourable binding. These findings underscore the potential of these compounds as novel inhibitors of AChE, offering insights into alternative therapeutic avenues for Alzheimer's disease. Further investigation, including in vitro and in vivo studies, is needed to validate the efficacy, safety profiles, and therapeutic potential of these compounds for Alzheimer's disease treatment. |
| <b>Order of Authors:</b>                                                             | Mahir Azmal, BSc<br>Md. Sahadot Hossen, MSc<br>Naimul Haque Shohan, BSc<br>Md Rasid Taqui, MSc<br>Abbeha Malik, MSc<br>Ajit Ghosh, PhD                                                                                                                                                                                                                                                                                                                                                                                                                                                                                                                                                                                                                                                                                                                                                                                                                                                                                                                                                                                                                                                                                                                                                                                                                                                                                                                                                                                                                                                                                                                                                                                                                                                                                                                                                                                                 |
| <b>Additional Information:</b>                                                       |                                                                                                                                                                                                                                                                                                                                                                                                                                                                                                                                                                                                                                                                                                                                                                                                                                                                                                                                                                                                                                                                                                                                                                                                                                                                                                                                                                                                                                                                                                                                                                                                                                                                                                                                                                                                                                                                                                                                        |
| <b>Question</b>                                                                      | <b>Response</b>                                                                                                                                                                                                                                                                                                                                                                                                                                                                                                                                                                                                                                                                                                                                                                                                                                                                                                                                                                                                                                                                                                                                                                                                                                                                                                                                                                                                                                                                                                                                                                                                                                                                                                                                                                                                                                                                                                                        |
| <b>Financial Disclosure</b>                                                          | The author(s) received no specific funding for this work.                                                                                                                                                                                                                                                                                                                                                                                                                                                                                                                                                                                                                                                                                                                                                                                                                                                                                                                                                                                                                                                                                                                                                                                                                                                                                                                                                                                                                                                                                                                                                                                                                                                                                                                                                                                                                                                                              |
| Enter a financial disclosure statement that describes the sources of funding for the |                                                                                                                                                                                                                                                                                                                                                                                                                                                                                                                                                                                                                                                                                                                                                                                                                                                                                                                                                                                                                                                                                                                                                                                                                                                                                                                                                                                                                                                                                                                                                                                                                                                                                                                                                                                                                                                                                                                                        |

work included in this submission. Review the [submission guidelines](#) for detailed requirements. View published research articles from [PLOS ONE](#) for specific examples.

This statement is required for submission and **will appear in the published article** if the submission is accepted. Please make sure it is accurate.

#### Funded studies

Enter a statement with the following details:

- Initials of the authors who received each award
- Grant numbers awarded to each author
- The full name of each funder
- URL of each funder website
- Did the sponsors or funders play any role in the study design, data collection and analysis, decision to publish, or preparation of the manuscript?

Did you receive funding for this work?

#### Competing Interests

Use the instructions below to enter a competing interest statement for this submission. On behalf of all authors, disclose any [competing interests](#) that could be perceived to bias this work—acknowledging all financial support and any other relevant financial or non-financial competing interests.

This statement is **required** for submission and **will appear in the published article** if the submission is accepted. Please make sure it is accurate and that any funding sources listed in your Funding Information later in the submission form are also declared in your Financial Disclosure statement.

View published research articles from [PLOS ONE](#) for specific examples.

The authors have declared that no competing interests exist.

**NO authors have competing interests**

Enter: *The authors have declared that no competing interests exist.*

**Authors with competing interests**

Enter competing interest details beginning with this statement:

*I have read the journal's policy and the authors of this manuscript have the following competing interests: [insert competing interests here]*

\* typeset

**Ethics Statement**

N/A

Enter an ethics statement for this submission. This statement is required if the study involved:

- Human participants
- Human specimens or tissue
- Vertebrate animals or cephalopods
- Vertebrate embryos or tissues
- Field research

Write "N/A" if the submission does not require an ethics statement.

General guidance is provided below. Consult the [submission guidelines](#) for detailed instructions. **Make sure that all information entered here is included in the Methods section of the manuscript.**

**Format for specific study types**

**Human Subject Research (involving human participants and/or tissue)**

- Give the name of the institutional review board or ethics committee that approved the study
- Include the approval number and/or a statement indicating approval of this research
- Indicate the form of consent obtained (written/oral) or the reason that consent was not obtained (e.g. the data were analyzed anonymously)

**Animal Research (involving vertebrate animals, embryos or tissues)**

- Provide the name of the Institutional Animal Care and Use Committee (IACUC) or other relevant ethics board that reviewed the study protocol, and indicate whether they approved this research or granted a formal waiver of ethical approval
- Include an approval number if one was obtained
- If the study involved *non-human primates*, add *additional details* about animal welfare and steps taken to ameliorate suffering
- If anesthesia, euthanasia, or any kind of animal sacrifice is part of the study, include briefly which substances and/or methods were applied

**Field Research**

Include the following details if this study involves the collection of plant, animal, or other materials from a natural setting:

- Field permit number
- Name of the institution or relevant body that granted permission

**Data Availability**

Authors are required to make all data underlying the findings described fully available, without restriction, and from the time of publication. PLOS allows rare exceptions to address legal and ethical concerns. See the [PLOS Data Policy](#) and [FAQ](#) for detailed information.

Yes - all data are fully available without restriction

A Data Availability Statement describing where the data can be found is required at submission. Your answers to this question constitute the Data Availability Statement and **will be published in the article**, if accepted.

**Important:** Stating 'data available on request from the author' is not sufficient. If your data are only available upon request, select 'No' for the first question and explain your exceptional situation in the text box.

Do the authors confirm that all data underlying the findings described in their manuscript are fully available without restriction?

**Describe where the data may be found in full sentences. If you are copying our sample text, replace any instances of XXX with the appropriate details.**

- If the data are **held or will be held in a public repository**, include URLs, accession numbers or DOIs. If this information will only be available after acceptance, indicate this by ticking the box below. For example: *All XXX files are available from the XXX database (accession number(s) XXX, XXX).*
- If the data are all contained **within the manuscript and/or Supporting Information files**, enter the following: *All relevant data are within the manuscript and its Supporting Information files.*
- If neither of these applies but you are able to provide **details of access elsewhere**, with or without limitations, please do so. For example:

*Data cannot be shared publicly because of [XXX]. Data are available from the XXX Institutional Data Access / Ethics Committee (contact via XXX) for researchers who meet the criteria for access to confidential data.*

*The data underlying the results presented in the study are available from (include the name of the third party*

All relevant data are within the manuscript and its Supporting Information files.

*and contact information or URL).*

- This text is appropriate if the data are owned by a third party and authors do not have permission to share the data.

\* typeset

Additional data availability information:

1 **A Computational Approach to Identify Phytochemicals as an inhibitor of**  
2 **Acetylcholinesterase: Molecular Docking, ADME profiling and Molecular Dynamics**  
3 **Simulations**

4 Mahir Azmal<sup>1</sup>, Md. Sahadot Hossen<sup>1</sup>, Naimul Haque Shohan<sup>1</sup>, Md Rasid Taqui<sup>1</sup>, Abbeha Malik<sup>2,\*</sup>,  
5 Ajit Ghosh<sup>1,\*</sup>

6  
7 <sup>1</sup>Department of Biochemistry and Molecular Biology, Shahjalal University of Science and  
8 Technology, Sylhet 3114, Bangladesh, and

9 <sup>2</sup>Department of Bioinformatics, Institute of Biochemistry, Biotechnology and Bioinformatics, The  
10 Islamia University of Bahawalpur, Pakistan.

11

12 \*Corresponding Author: [abbeha.malik@iub.edu.pk](mailto:abbeha.malik@iub.edu.pk), [aghosh-bmb@sust.edu](mailto:aghosh-bmb@sust.edu)

13 **Abstract**

14 Inhibition of acetylcholinesterase (AChE) is a crucial target in the treatment of Alzheimer's disease  
15 (AD). Common anti-acetylcholinesterase drugs such as galantamine, rivastigmine, donepezil, and  
16 tacrine have significant inhibition potential. Due to side effects and safety concerns, we aimed to  
17 investigate a wide range of phytochemicals and structural analogues of these compounds.  
18 Compounds similar to established drugs, and phytochemicals were investigated as potential  
19 inhibitors for AChE in treating AD. A total of 2,270 compound libraries were generated for further  
20 analysis. Initial virtual screening was performed using Pyrx software, resulting in 638 molecules  
21 showing higher binding affinities compared to positive controls Tacrine (-9.0 kcal/mol), Donepezil  
22 (-7.3 kcal/mol), Galantamine (-8.3 kcal/mol), and Rivastigmine (-6.4 kcal/mol). Subsequently,  
23 ADME properties were assessed, including blood-brain barrier permeability and Lipinski's rule of  
24 five violations, leading to 88 compounds passing the ADME analysis. Among the rivastigmine  
25 analogous, [3-(1-methylpiperidin-2-yl)phenyl] N,N-diethylcarbamate showed interaction with  
26 Tyr123, Tyr336, Tyr340, Phe337, Trp285 residues of AChE. Tacrine similar compounds, such as  
27 4-amino-2-styrylquinoline, exhibited bindings with Tyr123, Phe337, Tyr336, Trp285, Trp85,  
28 Gly119, and Gly120 residues. A phytocompound bisdemethoxycurcumin showed interaction with  
29 Trp285, Tyr340, Trp85, Tyr71, and His446 residues of AChE with favourable binding. These  
30 findings underscore the potential of these compounds as novel inhibitors of AChE, offering  
31 insights into alternative therapeutic avenues for Alzheimer's disease. Further investigation,  
32 including in vitro and in vivo studies, is needed to validate the efficacy, safety profiles, and  
33 therapeutic potential of these compounds for Alzheimer's disease treatment.

34

35 **Keywords:** Alzheimer's disease, Acetylcholinesterase, Phytochemicals, Molecular docking,  
36 Molecular dynamic simulation.



## 37 Introduction

38 Alzheimer's disease (AD) is a neurological disorder that leads to the deterioration of brain cells. It  
39 is the primary cause of dementia, a condition marked by a decline in cognitive abilities and a loss  
40 of independence in daily tasks (Breijyeh & Karaman, 2020). AD is characterized by a decline in  
41 the cholinergic system, resulting in reduced levels of acetylcholine in brain regions responsible for  
42 learning, memory, behaviour, and emotional responses (Anand et al., 2012). AD is  
43 neuropathologically defined by the presence of beta-amyloid (A $\beta$ ) plaques, neurofibrillary tangles,  
44 and degeneration or atrophy of the basal forebrain cholinergic neurons (Roberson & Harrell, 1997).  
45 Acetylcholinesterase (AChE), an enzyme that belongs to the serine hydrolase family, plays a vital  
46 role in breaking down acetylcholine (ACh) into choline and acetate. Therefore, maintaining normal  
47 cholinergic neurotransmission. In AD patients ACh degradation is amplified by the AChE in early  
48 stages. The use of enzymatic inhibition to reduce AChE activity has shown promise as a treatment  
49 strategy for AD (Du et al., 2018). The FDA-approved AChE enzyme inhibitors donepezil and  
50 rivastigmine are utilized for the treatment of mild to moderate AD. Tacrine was one of the AChE  
51 inhibitory drugs which had been banned since 2013. Both medications have adverse effects such  
52 as nausea, diarrhoea, loss of appetite, fainting, abdominal pain, and vomiting (Tayeb et al., 2012).  
53 Administration of tacrine (THA) for AD treatment leads to reversible hepatotoxicity in 30-50% of  
54 patients, as evidenced by an elevation in transaminase levels (Lagadic-Gossmann et al., 1998).  
55 Therefore, scientists are searching for more effective agents with fewer side effects (Scheltens et  
56 al., 2021).

57 Researchers have investigated natural resources for anti-AChE agents because they are safer than  
58 synthetic chemicals (Kim et al., 2010). Galantamine, a natural drug from *Galanthus woronowii*, is  
59 used to treat AD alongside other chemical drugs (Bartolucci et al., 2001). However, none of these  
60 medications have proven to be entirely effective in halting the advancement or formation of AD.  
61 To ameliorate the potential side effects and optimize the therapeutic efficacy of enzyme inhibition,  
62 compounds possessing structural similarities to FDA-approved drugs emerge as promising  
63 candidates (Birks & Harvey, 2003; Olin & Schneider, 2002; Onor et al., 2007). Ongoing research  
64 is being conducted to discover novel compounds derived from natural sources or FDA-approved  
65 drug-like compounds with anti-AChE properties (Pilger et al., 2001). Natural products derived  
66 from different plants are increasingly being recognized globally for their potential as AChE  
67 inhibitors (AChEi), making them a promising therapeutic option for the treatment of AD (Taqui et

68 al., 2022). Extensive research has identified a comprehensive list of plant-derived substances that  
69 inhibit AChE. The research on AChE inhibition-based treatment of AD has focused on this diverse  
70 range of phytochemicals due to the absence of promising, effective, and safe inhibitors (Kim et al.,  
71 2010; Sarkar et al., 2021).

72 Studies have demonstrated that memory-enhancing herbs such as *Enhydra fluctuans*, *Vanda*  
73 *roxburghii*, *Bacopa monnieri*, *Centella asiatica*, *Convolvulus pluricaulis*, and *Aegle marmelos*  
74 have acetylcholinesterase inhibitory and antioxidant properties. Acetylcholinesterase, the main  
75 cholinesterase in the brain that breaks down acetylcholine, shows greater specificity for  
76 acetylcholine. The findings indicate possible advantages for treating Alzheimer's disease (Lopa et  
77 al., 2021). This study aims to elucidate how human AChE is inhibited by the current FDA-  
78 approved drugs similar to structure analogues, as well as phytochemicals. Our study aimed to  
79 assess the *in-silico* assay results through docking, ADME simulation (RMSD, RMSF, Ligand  
80 properties), PCA, and DCCM, comparing them with FDA-approved drugs (donepezil,  
81 galantamine, rivastigmine), a selective AChE inhibitor employed in current AD therapy.

82

## 83 **Materials and Methods**

### 84 **Ligand Selection**

#### 85 ***Ligand library 1: Similar structure selection***

86 The rationale behind constructing library 1 (Similar structure search) was two-sided. Firstly,  
87 compounds with analogous structures might be able to show a similar kind of effect to some extent.  
88 Secondly, studies have reported mild to severe adverse effects upon their administration and  
89 among them. Each of the four compounds was used as a query in the PubChem database followed  
90 by a similar structure search.

91

#### 92 ***Ligand library 2: Dr. Duke database search for phytochemicals***

93 Phytochemicals, known for their anti-AChE and anti- Butyrylcholinesterase (BChE) activities,  
94 were identified through a literature review of medicinal plants. Scientific names were queried in  
95 Dr. Duke's Phytochemical and Ethnobotanical Databases (<https://phytochem.nal.usda.gov/>).  
96 Compound names were then searched in PubChem for 3-D structure retrieval.

## 97 **Selection of target protein and protein preparation**

98 The RCSB-PDB database (<https://www.rcsb.org>) was utilized to search for the target protein,  
99 human acetylcholinesterase protein (PDB ID: 4M0E) with a lower X-ray resolution (2.00 Å).  
100 Several gaps were spotted while checking the structure with PyMol. Both the docking and  
101 simulation processes were vulnerable to interference from missing residues. To avoid any  
102 subsequent anomaly in docking and molecular dynamics simulation the spotted missing residues  
103 were repaired. To ensure the missing residues I-tasser (<https://zhanggroup.org/I-TASSER/>) a web-  
104 based server was used to predict the 3D structure of protein. The FASTA sequence was retrieved  
105 from the RCSB PDB database and used to build the predicted structure. The geometry analysis  
106 was performed using the MolProbity server (<http://molprobity.biochem.duke.edu/>), and the overall  
107 geometry and Ramachandran plots were analyzed.

108

## 109 **Active site prediction**

110 The active region on the surface of the protein that performs protein function is known as a protein-  
111 ligand binding site. To avoid blind docking the specific amino acid residues (Table S1) of protein-  
112 ligand interaction were predicted using CASTP v3.0  
113 (<http://sts.bioe.uic.edu/castp/calculation.html>).

114

## 115 **Molecular docking of primarily selected molecules.**

116 PyRx 0.8 was used for the initial virtual screening (Dallakyan & Olson, 2015a). The protein was  
117 retrieved from the I-tasser website in PDB format after homology modelling and ligands were  
118 downloaded from the PubChem of NCBI (<https://pubchem.ncbi.nlm.nih.gov>) one by one in SDF  
119 file format.

120 The target protein was loaded in Pyrx 0.8 and converted into macromolecules. The similar  
121 structures of tacrine, donepezil, rivastigmine and galantamine (considered as controls) along with  
122 phytochemicals were loaded in the PyRx virtual screening tool. After energy minimization, it was  
123 converted into a pdbqt file. All the parameters and grid box positioned at some standard value  
124 (Centre box: X = -0.9600, Y = -38.1677, Z = 34.2085) and the dimensions in Angstrom were X =  
125 58.7652, Y = 60.0782 and Z = 65.867. Later, the docking results were screened for binding affinity  
126 and then all the generated possible docked conformations were stored in CSV format (Dallakyan  
127 & Olson, 2015b). Only those conformations that interacted specifically with the active-site

128 residues of the target protein targeted protein were selected and further detailed interactions were  
129 explored through Discovery Studio and PyMOL.

130

### 131 **ADME Profiling**

132 The SwissADME (<http://www.swissadme.ch/index.php>) server was utilized to conduct ADME  
133 profiling. Canonical smiles of ligands were required for conducting ADME analysis. To perform  
134 ADME profiling, the canonical smiles of all the ligands were uploaded as input on the  
135 SwissADME server. The entirety of the data was acquired in the CSV (comma-separated value)  
136 format. The subsequent sorting procedure was conducted according to the permeability of the  
137 blood-brain barrier, greater binding affinity, violations of drug-likeness violation (Lipinski, Ghose,  
138 Veber, Egan, Muggue), and oral bioactivity (lipophilicity, flexibility, solubility, instability, size)  
139 (Daina et al., 2017).

140

### 141 **Molecular Re-docking performance**

142 Re-docking was performed by the AutoDock Vina tool for the reliability of the software, and  
143 consistency of the docking algorithm. The target protein was converted into pdbqt. The parameters  
144 and grid box were positioned at some standard value (Centre box: X =106.848, Y = 43.703, Z =  
145 18.797) and the dimensions of Box in Angstrom were X = 126, Y = 116 and Z = 122. Subsequently,  
146 the docking results were screened for binding affinity and generated all possible docked  
147 conformations were stored in the pdbqt file. Docking results were reported as a negative score in  
148 kcal/mol where the lowest docking score indicates the highest binding affinity (Kuntz, 1992).

149

### 150 **Molecular Dynamic Simulation**

151 Protein-ligand interaction stability during macromolecule structure-to-function transitions was  
152 studied using molecular dynamics. The Desmond software, developed by Schrödinger LLC,  
153 enabled the execution of molecular dynamics (MD) simulations that lasted for a duration of 100  
154 nanoseconds. The simulations, utilizing Newton's classical equation of motion, monitored the path  
155 of atoms as they moved through time. The receptor-ligand complex was subjected to preprocessing  
156 using Maestro's Protein Preparation Wizard, which included optimization and minimization  
157 procedures. The system was prepared using the System Builder tool, employing the Transferable

158 Intermolecular Interaction Potential 3 Points (TIP3P) solvent model within an orthorhombic box.  
 159 The simulation was governed by the OPLS 2005 force field, and counter ions were introduced to  
 160 maintain model neutrality. A 0.15 M sodium chloride (NaCl) solution was added to replicate the  
 161 conditions found in the body. The simulations were conducted using the Number of particles (N),  
 162 Pressure (P), and Temperature (NPT) ensemble, with a temperature of 300 K and a pressure of 1  
 163 atm. Before the simulation, the models underwent a process of relaxation. The trajectories were  
 164 recorded at intervals of 100 picoseconds. The stability was evaluated by comparing the root mean  
 165 square deviation (RMSD), root mean square fluctuation (RMSF), Ligand properties (radius of  
 166 Gyration, Molecular surface area, hydrogen bond etc.), PCA and DCCM of the protein and ligand  
 167 during the entire simulation (Malik et al., 2023; Rathod et al., 2023).

## 169 Results

### 170 Ligand library construction

171 The number of similar structure compounds were massive; however, considering the facts about  
 172 drug-likeness several criteria were optimized to select the best suited structures. A total of 2252  
 173 similar compounds (library 1) and 18 phytochemicals (library 2) were primarily selected for virtual  
 174 screening based on the selection criteria (Table 1).

175  
 176 **Table 1:** Primary selection Criteria for similar structure compounds

| Compound name/Criteria | Molecular Weight [Min-Max] | Rotatable Bond Count [Min-Max] | Heavy Atom Count [Min-Max] | H-Bond Donor Count [Min-Max] | H-Bond Acceptor Count [Min-Max] | Polar Area, [Angstrom sq] [Min-Max] | Complexity [Min-Max] | XLOGP [Min-Max] |
|------------------------|----------------------------|--------------------------------|----------------------------|------------------------------|---------------------------------|-------------------------------------|----------------------|-----------------|
| Tacrine                | 147-467                    | 0-9                            | 12-30                      | 0-4                          | 0-10                            | 4.9-104                             | 144-494              | 1-5             |
| Donepezil              | 289-479                    | 4-9                            | 21-35                      | 0-2                          | 2-8                             | 26.3-119                            | 366-776              | 2-5             |
| Rivastigmine           | 179.26-479                 | 2-9                            | 13-30                      | 0-3                          | 2-7                             | 12.2-112                            | 147-497              | -0.3-4.7        |
| Galantamine            | 245-445                    | 0-9                            | 18-32                      | 0-4                          | 2-9                             | 18.5-128                            | 326-766              | -2.4-4          |

177

### 178 **3D structure prediction**

179 The I-tasser gave a modelled structure which is like the 4M0E pdb (Fig. 1). The alignment of the  
180 sequence of amino acids is provided to verify the residues, with further sequence alignment and  
181 geometry details (Table S2 and Table S3). The Ramachandran plot (Fig. S1) shows the statistical  
182 distribution of the combinations of the backbone dihedral angles  $\phi$  and  $\psi$ . In theory, the allowed  
183 regions of the Ramachandran plot show which values of the Phi/Psi angles are possible for an  
184 amino acid, X, in an ala-X-ala tripeptide (Wiltgen, 2019). The Ramachandran plot analysis of  
185 protein AChE showed high conformational quality, with no outliers identified. All 537 residues  
186 (100%) were in acceptable regions (>99.8%), with 96.6% (519/537) falling within favoured  
187 regions (>98%). The findings show the strong structural integrity of AChE (Sobolev et al., 2020).

188  
189 **Figure 1. The alignment between the RCSB PDB structure and the 3D predicted structure of**  
190 **the 4M0E protein is depicted.** The resolved missing residues and the conservation of the protein  
191 structure compared to its actual PDB sequence are shown.

### 192 193 **Virtual Screening with PyRx**

194 Using PyRx 0.8 docking tools, the original phytochemicals, and four others with a similar structure  
195 were docked. The affinity of tacrine, donepezil, galantamine, and rivastigmine binding was  
196 considered as positive control which is -9.0 kcal/mol, -7.3 kcal/mol, -8.3 kcal/mol and -6.4  
197 kcal/mol, and the value (kcal/mol) greater than that was considered as the target ligand. The  
198 primary screening was performed by compounds with greater binding affinity than tacrine,  
199 rivastigmine, donepezil, and galantamine. A total of 620 molecules have exhibited higher binding  
200 affinity than the control molecules (tacrine, donepezil, rivastigmine, and galantamine), including  
201 18 phytochemicals sourced from the Dr. Dukes database (<https://phytochem.nal.usda.gov/>) (Table  
202 S4).

### 203 204 **ADME profiling of Screened phytochemicals**

205 The SwissADME (<http://www.swissadme.ch/index.php>) was utilized to examine the ADME  
206 profile and ability to traverse the blood-brain barrier for the selected 638 phytochemicals. During  
207 this phase of the investigation, most of the phytochemicals did not meet the drug-likeness property  
208 that was assessed. Lipinski's rule states that, historically, 90% of orally absorbed drugs had fewer

209 than 5 H-bond donors, less than 10 H-bond acceptors, molecular weight of less than 500 Daltons  
210 and XlogP values of less than 5 (Dai et al., 2016). Due to their high solubility, many  
211 phytochemicals may struggle to penetrate the blood-brain barrier (BBB). Therefore, compounds  
212 with a blood-brain barrier permeability (BBB) equal to or higher than 0.477 (Log 3) were  
213 prioritized for analysis as potentially potent BBB-permeable candidates. Additionally, high  
214 gastrointestinal (GI) absorption was assessed. A comprehensive analysis of the ADME (absorption,  
215 distribution, metabolism, and excretion) and docking results for similar chemical and  
216 phytochemical structures was performed (Tables 2, 3, 4 and 5). These tables provide valuable  
217 insights into the compounds' pharmacokinetic properties and their potential interactions with target  
218 proteins. A total of 89 compounds along with phytochemicals were found to possess the properties  
219 that were assessed (Table S5).

220

### 221 **Computational molecular docking with AutoDock**

222 Outperforming control compounds tacrine, donepezil, galantamine, and rivastigmine, 88 identified  
223 molecules exhibit enhanced binding affinity in molecular docking via AutoDock Vina-1.5.7. These  
224 findings suggest their potential as promising acetylcholinesterase inhibitors, warranting further  
225 investigation, this study establishes a benchmark for assessing the comparative efficacy of the  
226 identified molecules with the positive control. The docking and redocking outcomes for the  
227 remaining compounds are comprehensively presented in the accompanying tables, encapsulating  
228 a comprehensive overview of their binding characteristics for further analytical consideration. This  
229 nuanced evaluation contributes to the burgeoning discourse surrounding potential therapeutic  
230 candidates for the development of novel acetylcholinesterase inhibitors (Motebennur et al., 2023).  
231 The binding affinities of rivastigmine analog compounds, which exhibit both blood-brain barrier  
232 (BBB) permeability and favorable drug-likeness characteristics, were further investigated (Table  
233 2). Notably, three rivastigmine analogs, such as 10989924 ([3-(1-methylpiperidin-2-yl)phenyl]  
234 N,N-diethylcarbamate), 74817986 ([3-[1-[methyl(1-phenylethyl)amino]ethyl]phenyl] N-ethyl-N-  
235 methylcarbamate ) and 46898202 [3-(1-piperidin-1-ylethyl)phenyl] N,N-diethylcarbamate ,  
236 exhibited superior docking affinities as compared to rivastigmine. This observation suggests a  
237 potential enhancement in the binding interactions of these molecules with the target receptor.

238

239 **Table 2.** The docking, redocking and ADME results of Rivastigmine's similar structure with CID  
 240 and chemical name.

| Sl no | CID       | IUPAC Name                                                                                                              | Binding Affinity | Redocking | BBB   | Rules 5 violation | GI absorption | Leadlike ness violation s |
|-------|-----------|-------------------------------------------------------------------------------------------------------------------------|------------------|-----------|-------|-------------------|---------------|---------------------------|
| 1     | 77991     | Rivastigmine                                                                                                            | -6.4             | -6.5      | 0.508 | 0                 | High          | 0                         |
| 2     | 70266158  | [2-[1-(azetidin-1-yl)ethyl]phenyl] N,N-dimethylcarbamate                                                                | -8.1             | -7.3      | 0.564 | 0                 | High          | 2                         |
| 3     | 66717459  | [3-[(1S)-1-(dimethylamino)ethyl]-2-tritiohenyl] N-ethyl-N-methylcarbamate                                               | -8.1             | -7.9      | 0.506 | 0                 | High          | 1                         |
| 4     | 42604975  | [3-[(1S)-1-[methyl-[(1S)-1-phenylethyl]amino]ethyl]phenyl] N-ethyl-N-methylcarbamate                                    | -8               | -7.7      | 0.501 | 0                 | High          | 2                         |
| 5     | 129309692 | [3-[1-[(1S)-1-cyclohexa-1,3-dien-1-ylethyl]-methylamino]ethyl]phenyl] N-ethyl-N-methylcarbamate                         | -7.9             | -7.5      | 0.502 | 0                 | High          | 2                         |
| 6     | 68377091  | [3-[(1S)-1-(dimethylamino)ethyl]phenyl] N-ethynyl-N-[(2R)-1-phenylpropan-2-yl]carbamate                                 | -7.7             | -8.2      | 0.516 | 0                 | High          | 2                         |
| 7     | 144066490 | [3-[1-(dimethylamino)ethyl]phenyl] N-methyl-N-[(2R)-1-phenylpropan-2-yl]carbamate                                       | -7.7             | -7.7      | 0.506 | 0                 | High          | 3                         |
| 8     | 10989924  | [3-(1-methylpiperidin-2-yl)phenyl] N,N-diethylcarbamate                                                                 | -7.6             | -8.3      | 0.528 | 0                 | High          | 2                         |
| 9     | 11359764  | [3-[(1S)-1-[methyl(trideuterio(113C)methyl)amino]ethyl]phenyl] N-methyl-N-(1,1,2,2,2-pentadeuterio(213C)ethyl)carbamate | -7.6             | -7.2      | 0.506 | 0                 | High          | 0                         |
| 10    | 46898202  | [3-(1-piperidin-1-ylethyl)phenyl] N,N-diethylcarbamate                                                                  | -7.6             | N/A       | 0.506 | 0                 | High          | 2                         |
| 11    | 149047000 | [3-[1-(dimethylamino)cyclopropyl]phenyl] N-ethyl-N-methylcarbamate                                                      | -7.6             | -7.2      | 0.505 | 0                 | High          | 2                         |
| 12    | 144474639 | [3-[(1S)-1-[(1S)-1-cyclohexa-2,4-dien-1-ylethyl]-methylamino]ethyl]phenyl] N-ethyl-N-methylcarbamate                    | -7.6             | -7        | 0.501 | 0                 | High          | 0                         |
| 13    | 21767521  | 7-[1-(dimethylamino)ethyl]-3-methyl-5,6-dihydro-4H-1,3-benzoxazocin-2-one                                               | -7.5             | -6.6      | 0.555 | 0                 | High          | 2                         |
| 14    | 21767510  | 6-[1-(dimethylamino)ethyl]-3-methyl-4,5-dihydro-1,3-benzoxazepin-2-one                                                  | -7.4             | -6.2      | 0.546 | 0                 | High          | 0                         |
| 15    | 25204947  | [3-[(1S)-1-(dimethylamino)ethyl]phenyl] N-methyl-N-[(2S)-1-phenylpropan-2-yl]carbamate                                  | -7.4             | -7.8      | 0.506 | 0                 | High          | 1                         |
| 16    | 72816136  | [3-[1-(dimethylamino)ethyl]phenyl] N-methyl-N-(1-phenylpropan-2-yl)carbamate                                            | -7.4             | -7.7      | 0.506 | 0                 | High          | 2                         |
| 17    | 13955119  | [2-[1-(dimethylamino)ethyl]phenyl] N,N-dimethylcarbamate                                                                | -7.3             | -6.1      | 0.478 | 0                 | High          | 2                         |
| 18    | 141557115 | [3-[1-(dimethylamino)pentyl]phenyl] acetate                                                                             | -7.3             | -6.3      | 0.566 | 0                 | High          | 1                         |
| 19    | 21767515  | 9-[1-(dimethylamino)ethyl]-3-methyl-5,6-dihydro-4H-1,3-benzoxazocin-2-one                                               | -7.2             | -7.3      | 0.547 | 0                 | High          | 1                         |
| 20    | 21767496  | 5-[1-(dimethylamino)ethyl]-3-methyl-4H-1,3-benzoxazin-2-one                                                             | -7.2             | -6.6      | 0.540 | 0                 | High          | 1                         |
| 21    | 10935608  | [2-(1-piperidin-1-ylethyl)phenyl] N,N-diethylcarbamate                                                                  | -7.2             | -7.2      | 0.520 | 0                 | High          | 0                         |
| 22    | 10924256  | [3-(piperidin-1-ylmethyl)phenyl] N,N-diethylcarbamate                                                                   | -7.2             | -7.2      | 0.517 | 0                 | High          | 1                         |
| 23    | 144474633 | [3-[(2S)-1-(dimethylamino)propan-2-yl]phenyl] N-ethyl-N-methylcarbamate                                                 | -7.1             | -6.7      | 0.503 | 0                 | High          | 0                         |
| 24    | 25230721  | [3-[(1S)-1,2,2,2-tetradeuterio-1-(dimethylamino)ethyl]phenyl] N-ethyl-N-methylcarbamate                                 | -7.1             |           | 0.509 | 0                 | High          | 1                         |
| 25    | 51037855  | [3-[(1S)-1,2,2,2-tetradeuterio-1-(dimethylamino)(213C)ethyl]phenyl] N-ethyl-N-methylcarbamate                           | -7.1             | -6.4      | 0.508 | 0                 | High          | 0                         |
| 26    | 51038065  | [3-[(1S)-1-[methyl(trideuterio(113C)methyl)amino]ethyl]phenyl] N-ethyl-N-methylcarbamate                                | -7.1             | -6.4      | 0.508 | 0                 | High          | 0                         |



|    |           |                                                                                                                                                                   |      |      |       |   |      |   |
|----|-----------|-------------------------------------------------------------------------------------------------------------------------------------------------------------------|------|------|-------|---|------|---|
| 27 | 21767507  | [3-[(1S)-1-[methyl(trideuterio(113C)methyl)amino]ethyl]phenyl] N-methyl-N-(1,1,2,2,2-pentadeuterio(213C)ethyl)carbamate                                           | -7.1 | -7.3 | 0.508 | 0 | High | 0 |
| 28 | 9823072   | [3-[(1S)-1-(dimethylamino)ethyl]-2-tritiophenyl] N-ethyl-N-methylcarbamate                                                                                        | -7.1 | -6.8 | 0.497 | 0 | High | 0 |
| 29 | 53705187  | [2-[[ethyl(methyl)amino]methyl]phenyl] N,N-dimethylcarbamate                                                                                                      | -7   | -6.6 | 0.493 | 0 | High | 1 |
| 30 | 97357026  | [3-[(1R)-1-(dimethylamino)ethyl]phenyl] N,N-diethylcarbamate                                                                                                      | -7   | -6.9 | 0.517 | 0 | High | 0 |
| 31 | 11066683  | [3-(1-piperidin-1-ylethyl)phenyl] N,N-diethylcarbamate                                                                                                            | -6.9 | -7.2 | 0.493 | 0 | High | 1 |
| 32 | 25230725  | [3-[(1S)-1-[bis(trideuteriomethyl)amino]-1,2,2,2-tetradeuterioethyl]-2,4,5,6-tetradeuteriophenyl] N-(1,1,2,2,2-pentadeuterioethyl)-N-(trideuteriomethyl)carbamate | -6.8 | -6.4 | 0.517 | 0 | High | 0 |
| 33 | 144198864 | (1S)-1-(3-methoxyphenyl)-N,N-dimethylpropan-1-amine                                                                                                               | -6.7 | -6.1 | 0.508 | 0 | High | 0 |
| 34 | 67474850  | [3-[(1S)-1-(dimethylamino)ethyl]-4-fluorophenyl] N-ethyl-N-methylcarbamate                                                                                        | -6.7 | -6.7 | 0.764 | 0 | High | 0 |
| 35 | 10999871  | [3-(piperidin-1-ylmethyl)phenyl] N,N-dimethylcarbamate                                                                                                            | -6.7 | -7.5 | 0.545 | 0 | High | 1 |
| 36 | 10586926  | [3-[(1S)-1-(dimethylamino)ethyl]-2-tritiophenyl] N-ethyl-N-methylcarbamate                                                                                        | -6.7 | -6.5 | 0.533 | 0 | High | 0 |
| 37 | 71316042  | [3-(1-piperidin-1-ylethyl)phenyl] N,N-diethylcarbamate                                                                                                            | -6.7 | -6.6 | 0.508 | 0 | High | 0 |
| 38 | 745584    | [2-(dimethylamino)methyl]phenyl] N,N-dimethylcarbamate                                                                                                            | -6.6 | -6.5 | 0.493 | 0 | High | 0 |
| 39 | 25230720  | [2-deuterio-3-[(1S)-1-[dideuteriomethyl(methyl)amino]ethyl]phenyl] N-ethyl-N-methylcarbamate                                                                      | -6.6 | -7.2 | 0.532 | 0 | High | 0 |
| 40 | 25230723  | [3-[(1S)-1-(dimethylamino)ethyl]phenyl] N-ethyl-N-(trideuteriomethyl)carbamate                                                                                    | -6.6 | -7.3 | 0.508 | 0 | High | 1 |
| 41 | 25230724  | [3-[(1S)-1-(dimethylamino)ethyl]phenyl] N-methyl-N-(1,1,2,2,2-pentadeuterioethyl)carbamate                                                                        | -6.6 | -7.3 | 0.508 | 0 | High | 0 |
| 42 | 51037853  | [3-[(1S)-1,2,2,2-tetradeuterio-1-(dimethylamino)(113C)ethyl]phenyl] N-ethyl-N-methylcarbamate                                                                     | -6.6 | -7.4 | 0.508 | 0 | High | 0 |
| 43 | 51038067  | [3-[(1S)-1-[methyl(trideuterio(113C)methyl)amino]ethyl]phenyl] N-methyl-N-(1,1,2,2,2-pentadeuterio(213C)ethyl)carbamate                                           | -6.6 | -6.8 | 0.508 | 0 | High | 0 |
| 44 | 77991     | [3-(1-piperidin-1-ylethyl)phenyl] N,N-diethylcarbamate                                                                                                            | -6.6 | -6.4 | 0.508 | 0 | High | 0 |
| 45 | 92044359  | [3-[(1R)-1-[bis(trideuteriomethyl)amino]ethyl]phenyl] N-ethyl-N-methylcarbamate                                                                                   | -6.6 | -6.2 | 0.508 | 0 | High | 0 |

241 The binding affinities of tacrine and its structurally analogous exhibited the highest binding  
242 affinities in the entirety of the conducted docking study (Table 3). Notably, 2-naphthalen-2-  
243 ylquinolin-4-amine emerges as the most promising candidate, displaying a substantial binding  
244 affinity of -10.3 kcal/mol (PyRx) and -10.7 kcal/mol (AutoDock). The overall binding affinities  
245 observed collectively underscore the potential of these compounds for further exploration and  
246 development. Conversely, the galantamine similar structures presents only two compounds, and  
247 among them 4,14-dimethyl-11-oxa-4 azatetracyclo [8.7.1.01,12.06,18]octadeca-6(18),7,9,15-  
248 tetraen-9-ol was the best binding affinity with -8.4 and -7.9 kcal/mol, as the remaining analogs  
249 were judiciously excluded during primary virtual screening and ADME profiling (Table 4). This

250 stringent selection process aims to ensure structural and pharmacokinetic viability, contributing to  
 251 a refined pool of candidates with enhanced potential for subsequent stages of drug development.

252

253 **Table 3.** The Docking and redocking results of tacrine's similar structures with CID and chemical  
 254 name.

| Sl no | CID       | IUPAC Name                                                                         | Affinity PyrX Kcal/mol | Redocking Autodock Kcal/mol | BBB   | Rules 5 violation | GI absorption | Leadlikeness violations |
|-------|-----------|------------------------------------------------------------------------------------|------------------------|-----------------------------|-------|-------------------|---------------|-------------------------|
| 1     | 1935      | Tacrine                                                                            | -9.0                   | --8.8                       | 0.316 | 1                 | High          | 1                       |
| 2     | 18403988  | 2-naphthalen-2-ylquinolin-4-amine                                                  | -10.3                  | -10.7                       | 0.565 | 0                 | High          | 2                       |
| 3     | 149800    | N-benzylacridin-9-amine                                                            | -9.9                   | -9.4                        | 0.625 | 0                 | High          | 1                       |
| 4     | 402658    | 12-azatetracyclo[9.8.0.02,7.013,18]nonadecal(19),2,4,6,11,13,15,17-octaen-19-amine | -9.9                   | -9                          | 0.54  | 0                 | High          | 2                       |
| 5     | 54474520  | 3-[2-(7-fluoroquinolin-2-yl)ethenyl]aniline                                        | -9.8                   | -9                          | 0.596 | 0                 | High          | 2                       |
| 6     | 3438772   | 2-phenyl-4-pyrrolidin-1-ylquinoline                                                | -9.7                   | -9.4                        | 0.559 | 0                 | High          | 2                       |
| 7     | 18934490  | N-phenylacridin-1-amine                                                            | -9.7                   | -7.7                        | 0.485 | 0                 | High          | 3                       |
| 8     | 11492743  | 4-fluoro-2-(6-fluoro-4-methylquinolin-2-yl)aniline                                 | -9.6                   | -6.9                        | 0.602 | 0                 | High          | 2                       |
| 9     | 69799851  | 4-Amino-2-styrylquinoline                                                          | 9.5                    | 10.1                        | 0.577 | 0                 | High          | 1                       |
| 10    | 129829335 | 10-sulfidoacridin-10-ium                                                           | -9.5                   | -9                          | 0.708 | 0                 | High          | 0                       |
| 11    | 164587579 | 2-benzyl-6-fluoroquinolin-4-amine                                                  | -9.5                   | N/A                         | 0.692 | 0                 | High          | 2                       |
| 12    | 130408026 | 2-(7-fluoro-2-phenylquinolin-3-yl)ethanamine                                       | -9.5                   | -7.5                        | 0.533 | 0                 | High          | 2                       |
| 13    | 22395290  | 2-[(E)-2-phenylethenyl]quinolin-4-amine                                            | -9.5                   | -9.6                        | 0.521 | 0                 | High          | 0                       |
| 14    | 69799851  | 2-(2-phenylethenyl)quinolin-4-amine                                                | -9.5                   | -10.1                       | 0.521 | 0                 | High          | 2                       |
| 15    | 696663    | 12-azatetracyclo[9.8.0.02,7.013,18]nonadecal(19),2,4,6,11,13,15,17-octaen-19-amine | -9.5                   | -8.5                        | 0.495 | 0                 | High          | 0                       |
| 16    | 402666    | 19-azatetracyclo[9.8.0.02,7.013,18]nonadecal(19),2,4,6,11,13,15,17-octaen-12-amine | -9.5                   | -9.9                        | 0.483 | 0                 | High          | 1                       |
| 17    | 10587156  | 6-fluoro-2-(2-fluorophenyl)quinolin-4-amine                                        | -9.4                   | -9.8                        | 0.692 | 0                 | High          | 2                       |
| 18    | 1504001   | 2-phenyl-4-piperidin-1-ylquinoline                                                 | -9.4                   | -10                         | 0.535 | 0                 | High          | 2                       |
| 19    | 164587580 | 2-(2-fluorophenyl)quinolin-4-amine                                                 | -9.3                   | -8.2                        | 0.662 | 0                 | High          | 1                       |
| 20    | 60598     | 9-(4-methylpiperidin-1-yl)-1,2,3,4-tetrahydroacridine                              | -9.3                   | -9.1                        | 0.596 | 0                 | High          | 1                       |
| 21    | 4452632   | 3-quinolin-2-ylaniline                                                             | -9.3                   | -9.6                        | 0.506 | 0                 | High          | 1                       |
| 22    | 7742109   | (N <sub>Z</sub> )-N-(1-phenyl-2-quinolin-2-ylethylidene)hydroxylamine              | -9.3                   | -9.2                        | 0.487 | 0                 | High          | 0                       |
| 23    | 12102730  | 2,4-dimethylbenzo[h]quinolin-10-amine                                              | -9.3                   | -9.7                        | 0.48  | 0                 | High          | 1                       |
| 24    | 21998     | 10-methylacridin-10-ium-9-amine                                                    | -9.2                   | -9.5                        | 0.71  | 0                 | High          | 0                       |
| 25    | 45599224  | 12-azatetracyclo[9.8.0.02,7.013,18]nonadecal(19),2,4,6,11,13,15,17-octaen-19-amine | -9.2                   | -8                          | 0.653 | 0                 | High          | 1                       |
| 26    | 45599463  | 5,7-difluoro-2-phenylquinolin-4-amine                                              | -9.2                   | -9.7                        | 0.637 | 0                 | High          | 0                       |
| 27    | 22334541  | N-(3-fluorophenyl)-2,3-dihydro-1H-cyclopenta[b]quinolin-9-amine                    | -9.2                   | -9.2                        | 0.635 | 0                 | High          | 0                       |
| 28    | 11737199  | 2-(2-fluorophenyl)quinolin-4-amine                                                 | -9.2                   | -6.7                        | 0.583 | 0                 | High          | 0                       |
| 29    | 55045454  | 6-methyl-2-phenylquinolin-4-amine                                                  | -9.2                   |                             | 0.484 | 0                 | High          | 0                       |
| 30    | 31633     | 10-methylacridin-10-ium-3-amine                                                    | -9.1                   | -9.4                        | 0.71  | 0                 | High          | 1                       |
| 31    | 45599470  | 7,8-difluoro-2-phenylquinolin-4-amine                                              | -9.1                   | -9.8                        | 0.701 | 0                 | High          | 0                       |

|    |           |                                                                                     |      |      |       |   |      |   |
|----|-----------|-------------------------------------------------------------------------------------|------|------|-------|---|------|---|
| 32 | 45599222  | 6-fluoro-2-phenylquinolin-4-amine                                                   | -9.1 | -9.5 | 0.662 | 0 | High | 1 |
| 33 | 21828278  | 2,6-diphenylpyridin-4-amine                                                         | -9.1 | -9.7 | 0.613 | 0 | High | 0 |
| 34 | 21639083  | 12-azatetracyclo[9.8.0.02,7.013,18]nonadeca-1(19),2,4,6,11,13,15,17-octaen-19-amine | -9.1 | -7.4 | 0.607 | 0 | High | 0 |
| 35 | 43419931  | N-[(4-fluorophenyl)methyl]-2-methylquinolin-4-amine                                 | -9.1 | -7.1 | 0.545 | 0 | High | 0 |
| 36 | 129641425 | 2-(2-phenylethenyl)quinolin-3-amine                                                 | -9.1 | -9.2 | 0.521 | 0 | High | 1 |
| 37 | 12394207  | 2-phenyl-4-piperidin-1-ylquinoline                                                  | -9.1 | -8.7 | 0.518 | 0 | High | 0 |
| 38 | 10980245  | 2-(2-fluorophenyl)quinolin-4-amine                                                  | -9.1 | -8.6 | 0.506 | 0 | High | 0 |

255

256 **Table 4.** The Docking and redocking results of galantamine similar structure with CID and  
257 chemical name.

| SI no | CID (galantamine similar structures) | IUPAC Name                                                                                       | Affinity PyrX Kcal/mol | Redocking Autodock Kcal/mol | BBB   | Rules 5 violation | GI Absorption | Leadlikeness violations |
|-------|--------------------------------------|--------------------------------------------------------------------------------------------------|------------------------|-----------------------------|-------|-------------------|---------------|-------------------------|
| 1     | 9651                                 | Galantamine                                                                                      | -8.3                   | -8.7                        | -0.08 | 0                 | High          | 0                       |
| 2     | 91042094                             | 9-methoxy-4-prop-2-enyl-11-oxa-4-azatetracyclo[8.6.1.01,12.06,17]heptadeca-6(17),7,9,15-tetraene | -8.6                   | -9.2                        | 0.48  | 0                 | High          | 1                       |
| 3     | 20706288                             | 4,14-dimethyl-11-oxa-4-azatetracyclo[8.7.1.01,12.06,18]octadeca-6(18),7,9,15-tetraen-9-ol        | -8.4                   | -7.9                        | 0.59  | 0                 | High          | 0                       |

258

259 Phytochemicals meeting the criteria of the blood-brain barrier (BBB) permeability and favourable  
260 drug-likeness were subjected to further investigation through molecular docking (Table 5). Among  
261 these, berberine exhibited a notable binding affinity of -9.3 kcal/mol, huperzine B demonstrated -  
262 8.3 kcal/mol, bisdemethoxycurcumin revealed -9.3 kcal/mol, and curcumin displayed a binding  
263 affinity of -9.2 kcal/mol. These findings highlight the substantial potential of these phytochemicals  
264 as candidates for acetylcholinesterase inhibition.

265

266 **Table 5.** The Docking results of phytochemicals with CID and chemical name.

| SI no | Ligand CID | IUPAC Name           | Affinity PyrX Kcal/mol | Redocking Autodock Kcal/mol | BBB   | Rules 5 violation | GI Absorption | Leadlikeness violations |
|-------|------------|----------------------|------------------------|-----------------------------|-------|-------------------|---------------|-------------------------|
| 1     | 2353       | Berberine            | -9.3                   | -9.5                        | 0.198 | 0                 | High          | 1                       |
| 2     | 5315472    | Bisdemethoxycurcumin | -9.3                   | -9.7                        | 0.398 | 0                 | high          | 0                       |
| 3     | 6916252    | Huperzine B          | -8.3                   | -8.4                        | 0.489 | 0                 | High          | 0                       |
| 4     | 854026     | Huperzine A          | -7.9                   | -7.5                        | 0.317 | 0                 | High          | 1                       |
| 5     | 160512     | Ar-Turmerone         | -7.6                   | -7.8                        | 0.105 | 1                 | High          | 2                       |
| 6     | 1253       | (-)-Selagine         | -6.9                   | -6.8                        | 0.512 | 0                 | High          | 1                       |

267

## 268 Docking site analysis

269 To conduct a more comprehensive investigation, a total of eight compounds (Table 6) have been  
270 chosen for a molecular dynamics (MD) simulation lasting 100 nanoseconds Based on the docking  
271 analysis and ADME profiling. Utilizing BioVia Discovery Studio, it is feasible to visually observe

272 the interaction between protein ligands and active site residues, as well as to overlay all proteins  
 273 and ligands, based on their highest binding affinity and respective segments. The common residues  
 274 involved in the positive controls tacrine, galantamine, rivastigmine, and donepezil are- Tyr340,  
 275 Phe296, Trp285, Phe337, and Tyr123, and there was Tyr123 with a hydrogen bond and Trp285,  
 276 Tyr340, and Phe296 with Pi-allyl interaction. However, the residues involved in the interaction  
 277 and the binding sites exhibit similarities, as do the bonding characteristics. This suggests that the  
 278 binding location and residues are congruent to those to which tacrine, donepezil rivastigmine  
 279 galantamine bind.

280

281 **Table 6.** Docking site analysis for selected chemicals.

| Sl no | Ligand name                                                                                      | Complex   | Pubchem CID | Pyrx Docking | Autodock docking | Interacting Residues                                   |
|-------|--------------------------------------------------------------------------------------------------|-----------|-------------|--------------|------------------|--------------------------------------------------------|
| 1     | [3-(1-methylpiperidin-2-yl)phenyl] N,N-diethylcarbamate                                          | Complex_1 | 10989924    | -7.6         | -8.3             | Tyr123, Tyr336, Tyr340, Phe337, Trp285                 |
| 2     | 2-naphthalen-2-ylquinolin-4-amine                                                                | Complex_2 | 18403988    | -10.3        | -10.7            | Tyr123, Tyr285, Tyr340, His286, Asp73                  |
| 3     | 4-Amino-2-styrylquinoline                                                                        | Complex_3 | 69799851    | -9.5         | -10.1            | Tyr123, Phe337, Tyr336, Trp285, Trp85, Gly119, Gly120  |
| 4     | 9-methoxy-4-prop-2-enyl-11-oxa-4-azatetracyclo[8.6.1.01,12.06,17]heptadeca-6(17),7,9,15-tetraene | Complex_4 | 91042094    | -8.6         | -9.2             | Leu288, Leu75, Phe337, Phe296, Tyr340, Trp285          |
| 5     | Huperzine B                                                                                      | Complex_5 | 6916252     | -            | -8.3             | Trp285, Tyr123, Tyr71, Leu71                           |
| 6     | Bisdemethoxycurcumin                                                                             | Complex_6 | 5315472     | -            | -9.3             | Trp285, Tyr340, Trp85, Tyr71, His446                   |
| 7     | Berberine                                                                                        | Complex_7 | 2353        | -            | -9.3             | Tyr123, Tyr336, Tyr340, Phe337, Trp285, Ser292, His286 |
| 8     | Ar-Turmerone                                                                                     | Complex_8 | 160512      | -            | -7.6             | Tyr123, Tyr336, Tyr340, Phe337, Trp285, Phe296, Leu288 |

282

283 The 2D interaction analysis elucidates the nature of binding interactions (Fig. 2), revealing the  
 284 presence of pi-alkyl and pi-sigma interactions while notably excluding electrostatic bonds.  
 285 Notably, TYR123 exhibits hydrogen bonding, and TRP285 displays pi-alkyl interaction across all  
 286 complexes. These residue interactions demonstrate a consistent pattern, underscoring the  
 287 reproducibility of specific binding motifs within the studied complexes.

288

289 **Figure 2: A visual representation of Protein-ligand interaction.** The protein-ligand interaction  
 290 of Complex\_1 (A), Complex\_2 (B), Complex\_3 (C), Complex\_4 (D), Complex\_5 (E), Complex\_6  
 291 (F), Complex\_7 (G), and Complex\_8 (H). All the interactions have common Tyr123 with a  
 292 hydrogen bond and Trp85 with Pi-allyl interaction. The rest of the interactions have Pi-sigma with  
 293 similar residues of the active side.

## 294 **Molecular Dynamics Simulation analysis**

295 The simulation was performed in a Desmond environment. There were 8 compounds primarily  
296 selected for MD simulation in the Desmond simulation environment. The overall simulation results  
297 were interpreted in RMSD, RMSF, Ligand properties, DCCM and PCA values. The binding  
298 grooves (Fig. 1) of the examined chemicals were superimposed, revealing a remarkable degree of  
299 similarity in their spatial arrangements. Additionally, the residues involved in interactions  
300 exhibited striking congruence among the compounds. This congruency in binding grooves and  
301 interacting residues suggests a conserved mode of binding, reinforcing the likelihood of a shared  
302 molecular mechanism or target engagement.

303  
304 **Figure 3: A visual representation of the binding pocket and ligand interaction.** (A) The 3d  
305 Structure of protein-ligand complex and protein hydrophobicity mapping. Close view of  
306 Complex\_1 (B), Complex\_3 (C), Complex\_6 (D). The protein pocket region is slightly bluish  
307 which indicates partially hydrophilic. All the ligands bind to the same side of the protein.

308  
309 The RMSD of Protein-ligand Complex figures have shown the Protein RMSD fit with ligand  
310 RMSD over a 100ns time scale. RMSD, which is the ligand insect in the protein RMSD line  
311 considered a good stability benchmark. Complex\_1 Complex\_3 and Complex\_6 show better  
312 binding stability (Fig. 3). The Root Mean Square Fluctuation (RMSF) is a valuable tool for  
313 quantifying localized variations along the protein chain. Peaks on the plots represent regions of  
314 the protein that exhibit the highest degree of fluctuation throughout the simulation. It is commonly  
315 observed that the tails, specifically the N- and C-terminal, exhibit greater fluctuations compared  
316 to other regions of the protein. Secondary structure elements, such as alpha helices and beta  
317 strands, typically exhibit greater rigidity compared to the unstructured regions of the protein. As a  
318 result, they undergo less fluctuation than the loop regions (Fig. 4).

319  
320 **Figure 4: A 100-nanosecond simulation is conducted to measure the root mean square**  
321 **deviation (RMSD).** Results of four complexes. Complexes 1, 2, and 3 are subjected to a 100-  
322 nanosecond molecular dynamics simulation using the Desmond software. A) RMSD of  
323 Complex\_1. B) RMSD of Complex\_3. C) RMSD of Complex\_6. The root means square deviation  
324 (RMSD) between the ligand and protein exhibits temporal constancy, thereby ensuring stability.

325 Nevertheless, complex\_1 and 3 demonstrate persistent stability, suggesting that the interaction  
326 between the protein and ligand remains intact throughout the entire duration. Complex\_6 exhibits  
327 a deviation of 30ns, indicating inferior stability compared to the other 2 complexes. Nevertheless,  
328 the overall binding interaction is not significantly unfavourable, and further investigation is  
329 required for the other parameters.

330

331 A ligand exhibiting a moderate degree of compactness, as measured by a moderate gyration value,  
332 could potentially achieve a harmonious equilibrium between sufficient molecular surface area  
333 (SASA) for interaction purposes and accessibility for binding. The combination of moderate  
334 gyration and a larger molecular surface area may provide numerous binding interaction sites,  
335 whereas a moderate SASA may indicate a stable structure with restricted solvent exposure (Fig.  
336 5).

337

338 **Figure 5: The root means square fluctuation (RMSF) of all the simulation complexes over a**  
339 **100-nanosecond simulation.** A- Root Mean Square Fluctuation (RMSF) of Complex\_1, B- RMSF  
340 of Complex\_3, C- RMSF of Complex\_6. The interpretation of the results is justified. Several  
341 significant fluctuations. The fluctuation primarily arises when the ligand interacts with the protein  
342 residues. Complex\_1 exhibits three significant fluctuations on the green vertical bar, which signify  
343 the contact between the ligand molecule and the protein. Complex\_3 and Complex\_6 exhibit  
344 significant temporal fluctuations. The overall comparison reveals significant fluctuations, although  
345 they do not exceed 4.8 Å.

346

347 The gyration results indicate that Complex\_1 and Complex\_3 is located within a range of 3.5-4.00  
348 Armstrong, while Complex\_6 is situated between 5.0-5.5 Å (Fig. 6A). A higher value of the radius  
349 of gyration indicates a greater dispersion of atoms and a longer molecule. This metric quantifies  
350 the degree of elongation of a ligand and is equal to its primary moment of inertia. The SASA  
351 analysis reveals superior ligand characteristics, specifically in Complex\_3 and Complex\_6, with a  
352 surface area ranging from 50 to 100 Armstrong square units (Fig. 6B). Reduced solvent-accessible  
353 surface area (SASA) leads to increased binding stability. The polar surface area and the molecular  
354 surface area exhibit significant differences. Complex\_1 exhibits lower levels of PSA and higher  
355 levels of MolSA, whereas Complex\_6 displays higher levels of both PSA and MolSA (Fig. 6, C

356 and D). Complex\_6 exhibits reduced levels of PSA and MolSA. Elevated PSA levels can  
357 potentially impact binding employing electrostatic interactions. A greater MolSA value signifies  
358 an increased number of sites available for interacting with other molecules or receptors.

359

360 **Figure 6: A 100ns simulation of Ligand Properties of all the Complexes.** (A) Ligand Gyration,  
361 (B) Ligand SASA, (C) Ligand Polar Surface Area (PSA), and (D) Molecular Surface Area  
362 (MolSA). Values of complex\_1, complex\_3, and complex\_6 are represented with blue, orange,  
363 and green colour, respectively.

364

### 365 **PCA analysis**

366 Principal Component Analysis (PCA) is a mathematical technique that identifies the most  
367 significant components in a dataset by analyzing the covariance or correlation matrix. In the  
368 context of protein analysis, PCA utilizes atomic coordinates to define the protein's available  
369 degrees of freedom (DOF). The result of those three results PCAs has been performed (Fig. 7).  
370 PCA analysis of each of the component percentage indicate each of the parameters, PC1 might  
371 indicate how strongly the ligand binds to the protein, PC2 could represent something like the  
372 flexibility of the protein-ligand complex and PC3 might capture variations in the shape  
373 complementarity between the protein and ligand.

374

375 **Figure 7: PCA analysis of Three Complexes.** The PCA of Complex\_1 (A), complex\_2 (B), and  
376 complex\_3 (C). The White dot here mentioning the transition state of protein ligand simulation  
377 confirmation, the blue dot with a scattered indicates energetically unstable conformational states  
378 and red dots indicate the stable conformational state.

379

380 The highest percentage of variance explained is indicated by the Single Component with the  
381 Highest Variance (PC1), as determined by the PCA analysis. Complex\_1 PCA yields the most  
382 favourable outcomes, followed by complex\_3 and complex\_6. By considering the amalgamation  
383 of constituents that capture substantial variation in contrast to the summaries of 46.18% and  
384 41.54% for both complexes, Complex\_1 exhibits a sum of 53% (Table 7). It exhibits improved  
385 variances. Complex 1 exhibits superior performance in both analyses, whether a singular

386 component with the highest variance is considered or a collection of components that collectively  
387 account for a substantial proportion of the data's variance is considered (David & Jacobs, 2014a).

388

389 **Table 7.** Different PCA components chart of each of the complexes

| Complex   | PCA Components |         |         |
|-----------|----------------|---------|---------|
|           | PC1 (%)        | PC2 (%) | PC3 (%) |
| Complex_1 | 44.7           | 8.21    | 6.76    |
| Complex_3 | 35.3           | 10.88   | 7.01    |
| Complex_6 | 33.21          | 8.33    | 5.75    |

390

### 391 **DCCM analysis**

392 The DCCM analysis method was applied in a novel way to assist in the identification of potential  
393 protein domains. During the implementation of this novel approach, multiple DCCM maps were  
394 computed, each utilizing a distinct coordinate reference frame to determine the boundaries of  
395 protein domains and the constituents of protein domain residues (Nascimento et al., 2022).

396

397 **Figure 8: The cross-correlation map of the C  $\alpha$  atom pairs within the monomers of AChE is**  
398 **analyzed for dynamics.** The DCCM of Complex\_1 (A), complex\_2 (B), and complex\_3 (C). The  
399 correlation coefficient ( $C_{ij}$ ) was represented using various colours. The values of  $C_{ij}$ , ranging  
400 from 0 to 1, indicate positive correlations. Positive correlations indicate that these pairs of atoms  
401 tend to move in similar directions or have comparable behaviours during the simulation. On the  
402 other hand, negative correlations are represented by  $C_{ij}$  values ranging from -1 to 0. Negative  
403 correlations indicate that these pairs of atoms tend to migrate in opposite directions or have  
404 contrasting behaviours during the simulation.

405

### 406 **Discussion**

407 The therapeutic intervention of Alzheimer's disease (AD) using acetylcholinesterase inhibitors  
408 (AChEi) has been demonstrated by a wide range of plant-based compounds (Santos et al., 2018).  
409 Given the absence of reliable, efficient, and secure inhibitors, investigating structurally similar  
410 compounds could be a promising field for researchers to explore (Čolović et al., 2013). In this  
411 study, we analyzed the chemical structures of tacrine, donepezil, galantamine, and rivastigmine to  
412 identify potential alternative drugs that are safer (Ahmed et al., 2021). Computer aid drug design  
413 (CADD) methodologies have been discovered to expand the repositories of chemical compounds



414 for the identification of potential inhibitors. The assessment of the binding affinity between a  
415 protein and a vast collection of ligands is frequently accomplished through the application of  
416 molecular docking techniques (Baig et al., 2018). The molecules within the applicability domain  
417 of the constructed-in silico model were screened to assess their drug-likeness and ADME  
418 properties. Drug likeness provides a highly valuable criterion for determining the minimum  
419 requirements that a compound must meet to be considered suitable for drug development (Gleeson  
420 et al., n.d.). This criterion helps in the objective selection of new drug candidates that have  
421 desirable bioavailability (Hefti, 2008).

422 Molecular docking is a highly effective approach in CADD that utilizes specific algorithms to  
423 determine the affinity scores based on the positioning of ligands within the binding pocket of a  
424 target. In molecular docking, the lowest docking score corresponds to the highest affinity,  
425 indicating that the complex remains in contact for a longer period with good stability (Agu et al.,  
426 2023; Meng et al., 2011). Rigorously examine the protein-ligand binding to identify compounds  
427 with higher binding affinity and potentially improved hydrogen bonding characteristics (Du et al.,  
428 2016). The analysis of the docking results confirmed the binding of the final three compounds,  
429 including [3-(1-methylpiperidin-2-yl)phenyl]. The residues Tyr123, Tyr336, Tyr340, Phe337, and  
430 Trp285 are involved in the interaction with N,N-diethyl carbamate. Specifically, Compound 3,  
431 identified as 4-amino-2-styrylquinoline, interacts with the residues Tyr 123, Phe 337, Tyr 336, Trp  
432 285, Trp 85, Gly 119, and Gly 120. Conversely, Compound 6, known as Bisdemethoxycurcumin,  
433 binds to the residues Trp 285, Tyr 123, Trp 85, Tyr 71, and His 446.

434 Molecular dynamics simulations demonstrated stable interactions between specific ligands and the  
435 AChE binding site. Notably, compounds like [3-(1-methylpiperidin-2-yl)phenyl] N,N-  
436 diethylcarbamate, 4-Amino-2-styrylquinoline and Bisdemethoxycurcumin displayed consistent  
437 and favorable interactions throughout the simulation period. Such stability suggests a potential for  
438 these compounds to serve as stable and effective inhibitors. The RMSD and RMSF values of these  
439 complexes remained quite stable throughout the simulation. Specifically, the complex involving  
440 4-Amino-2-styrylquinoline exhibited stability with a constant value over time. Similarly, [3-(1-  
441 methylpiperidin-2-yl)phenyl] N,N-diethylcarbamate also demonstrated stability during the  
442 simulation. Although the RMSD of Bisdemethoxycurcumin deviated, indicating a slight variation  
443 in the protein-ligand fit, the overall stability remained satisfactory. PCA and DCCM analysis of  
444 those three compounds were performed. Principal Component Analysis (PCA) in molecular

445 dynamics studies elucidates key factors influencing protein-ligand interactions. PC1 signifies  
446 binding strength, PC2 reflects protein-ligand complex flexibility, and PC3 captures shape  
447 complementarity. Higher PC1 scores denote stronger interactions, while elevated PC2 scores  
448 suggest increased complex flexibility. Enhanced PC3 scores indicate superior geometric fit  
449 between protein and ligand (David & Jacobs, 2014b). Complex\_1, comprising [3-(1-  
450 methylpiperidin-2-yl) phenyl] N, N-diethyl carbamate, binds with AChE and demonstrates  
451 superior performance in PC analysis. Additionally, Compounds 3 (4-Amino-2-styrylquinoline) and  
452 6 (Bisdemethoxycurcumin) exhibit promising results in PCA. Conversely, the DCCM analysis of  
453 compound 1 reveals a positive correlation among the protein-protein residues throughout the  
454 simulation, alongside stable correlations with certain compounds exhibiting both positive and  
455 negative associations (Avti et al., 2022).

456 Exploring the potential of computationally screened compounds in comparison to established  
457 drugs for Alzheimer's disease shows a promising direction for future research (Ahmed et al., 2021).  
458 Experimental validation using in vitro and in vivo studies is essential to confirm the effectiveness  
459 and safety characteristics of these identified compounds. Recognizing the constraints of the  
460 computational approach is crucial, including the inherent approximations in modelling, the  
461 possibility of false positives, and the requirement for experimental verification. The intricate  
462 characteristics of AD pathophysiology pose difficulties in identifying specific inhibitors that  
463 efficiently target the progression of the disease (Golriz Khatami et al., 2020). The combination of  
464 computational screening and molecular dynamics simulations provides an initial yet insightful  
465 view on potential inhibitors for AD (Lemkul & Bevan, 2012). The identified compounds show  
466 potential as candidates for further investigation and confirmation in preclinical and clinical studies.  
467 Nevertheless, the practical application of these compounds as effective treatments necessitates  
468 thorough experimental verification (Siddiqui et al., 2017).

469

## 470 **Conclusion**

471 The treatment of Alzheimer's disease through acetylcholinesterase inhibitors has been showcased  
472 by various plant-derived compounds. Considering the scarcity of dependable, effective, and safe  
473 inhibitors, exploring compounds with comparable structures holds promise as a potential avenue  
474 for investigation. One of the quickest and most economical methods is computational techniques.  
475 Computational biology has shown that different types of chemicals from plants and marine sources

476 have been identified and found to possess strong inhibitory effects against cholinesterase. In this  
477 study, we performed a virtual screening to discover new cholinesterase inhibitors from similar  
478 structures and plant compounds that interact with cholinesterase. Docking and molecular  
479 simulation tools were employed to investigate the significance of binding interactions of  
480 potentially new molecules for Alzheimer's disease treatment.

481

#### 482 **Data Availability**

483 All data supporting the described findings of the study can be obtained from the corresponding  
484 authors upon request.

485

#### 486 **Funding**

487 The authors declare that no funds, grants, or other support were received during the preparation of  
488 this manuscript.

489

#### 490 **Competing Interests**

491 The authors have no relevant financial or non-financial interests to disclose.

492

#### 493 **Authors' Contributions**

494 Mahir Azmal performed experiments, analyzed data, and wrote the draft. Md. Sahadot Hossen,  
495 Naimul Haque Shohan, and Md Rasid Taqui performed the experiments and analyzed the data.  
496 Abbeha Malik performed the simulation experiment and analyzed the data. Ajit Ghosh conceived  
497 and designed the experiments. All the authors read the final version of the manuscript.

498

#### 499 **Ethics declarations**

#### 500 **Ethics Approval**

501 Not applicable.

502

#### 503 **Consent for Publication**

504 Not applicable.

505

#### 506 **Acknowledgement**

507 The authors acknowledge the logistic support and laboratory facilities of the Department of  
508 Biochemistry and Molecular Biology, Shahjalal University of Science and Technology, Sylhet,  
509 Bangladesh.

510

## 511 **References**

512 Agu, P. C., Afiukwa, C. A., Orji, O. U., Ezeh, E. M., Ofoke, I. H., Ogbu, C. O., Ugwuja, E. I., &  
513 Aja, P. M. (2023). Molecular docking as a tool for the discovery of molecular targets of  
514 nutraceuticals in diseases management. *Scientific Reports*, *13*(1), Article 1.  
515 <https://doi.org/10.1038/s41598-023-40160-2>

516 Ahmed, S., Khan, S. T., Zargaham, M. K., Khan, A. U., Khan, S., Hussain, A., Uddin, J., Khan,  
517 A., & Al-Harrasi, A. (2021). Potential therapeutic natural products against Alzheimer's disease  
518 with Reference of Acetylcholinesterase. *Biomedicine & Pharmacotherapy*, *139*, 111609.  
519 <https://doi.org/10.1016/j.biopha.2021.111609>

520 Anand, P., Singh, B., & Singh, N. (2012). A review on coumarins as acetylcholinesterase inhibitors  
521 for Alzheimer's disease. *Bioorganic & Medicinal Chemistry*, *20*(3), 1175–1180.  
522 <https://doi.org/10.1016/j.bmc.2011.12.042>

523 Avti, P., Chauhan, A., Shekhar, N., Prajapat, M., Sarma, P., Kaur, H., Bhattacharyya, A., Kumar,  
524 S., Prakash, A., Sharma, S., & Medhi, B. (2022). Computational basis of SARS-CoV 2 main  
525 protease inhibition: An insight from molecular dynamics simulation based findings. *Journal of*  
526 *Biomolecular Structure and Dynamics*, *40*(19), 8894–8904.  
527 <https://doi.org/10.1080/07391102.2021.1922310>

528 Baig, M. H., Ahmad, K., Rabbani, G., Danishuddin, M., & Choi, I. (2018). Computer Aided Drug  
529 Design and its Application to the Development of Potential Drugs for Neurodegenerative  
530 Disorders. *Current Neuropharmacology*, *16*(6), 740–748.  
531 <https://doi.org/10.2174/1570159X15666171016163510>

532 Bartolucci, C., Perola, E., Pilger, C., Fels, G., & Lamba, D. (2001). Three-dimensional structure  
533 of a complex of galanthamine (Nivalin®) with acetylcholinesterase from *Torpedo californica*:  
534 Implications for the design of new anti-Alzheimer drugs. *Proteins: Structure, Function, and*

535 *Bioinformatics*, 42(2), 182–191. [https://doi.org/10.1002/1097-0134\(20010201\)42:2<182::AID-](https://doi.org/10.1002/1097-0134(20010201)42:2<182::AID-)  
536 PROT50>3.0.CO;2-1

537 Birks, J. S., & Harvey, R. (2003). Donepezil for dementia due to Alzheimer’s disease. *The*  
538 *Cochrane Database of Systematic Reviews*, 3, CD001190.  
539 <https://doi.org/10.1002/14651858.CD001190>

540 Breijyeh, Z., & Karaman, R. (2020). Comprehensive Review on Alzheimer’s Disease: Causes and  
541 Treatment. *Molecules*, 25(24), Article 24. <https://doi.org/10.3390/molecules25245789>

542 Čolović, M. B., Krstić, D. Z., Lazarević-Pašti, T. D., Bondžić, A. M., & Vasić, V. M. (2013).  
543 Acetylcholinesterase Inhibitors: Pharmacology and Toxicology. *Current Neuropharmacology*,  
544 11(3), 315–335. <https://doi.org/10.2174/1570159X11311030006>

545 Dai, S.-X., Li, W.-X., Han, F.-F., Guo, Y.-C., Zheng, J.-J., Liu, J.-Q., Wang, Q., Gao, Y.-D., Li, G.-  
546 H., & Huang, J.-F. (2016). In silico identification of anti-cancer compounds and plants from  
547 traditional Chinese medicine database. *Scientific Reports*, 6. <https://doi.org/10.1038/srep25462>

548 Daina, A., Michielin, O., & Zoete, V. (2017). SwissADME: A free web tool to evaluate  
549 pharmacokinetics, drug-likeness and medicinal chemistry friendliness of small molecules.  
550 *Scientific Reports*, 7, 42717. <https://doi.org/10.1038/srep42717>

551 Dallakyan, S., & Olson, A. J. (2015a). Small-molecule library screening by docking with PyRx.  
552 *Methods in Molecular Biology (Clifton, N.J.)*, 1263, 243–250. <https://doi.org/10.1007/978-1-4939->  
553 2269-7\_19

554 Dallakyan, S., & Olson, A. J. (2015b). Small-molecule library screening by docking with PyRx.  
555 *Methods in Molecular Biology (Clifton, N.J.)*, 1263, 243–250. <https://doi.org/10.1007/978-1-4939->  
556 2269-7\_19

557 David, C. C., & Jacobs, D. J. (2014a). Principal Component Analysis: A Method for Determining  
558 the Essential Dynamics of Proteins. *Methods in Molecular Biology (Clifton, N.J.)*, 1084, 193–226.  
559 [https://doi.org/10.1007/978-1-62703-658-0\\_11](https://doi.org/10.1007/978-1-62703-658-0_11)

560 David, C. C., & Jacobs, D. J. (2014b). Principal Component Analysis: A Method for Determining  
561 the Essential Dynamics of Proteins. *Methods in Molecular Biology (Clifton, N.J.)*, 1084, 193–226.  
562 [https://doi.org/10.1007/978-1-62703-658-0\\_11](https://doi.org/10.1007/978-1-62703-658-0_11)

563 dos Santos Nascimento, I. J., De Souza, M., Medeiros, D. C., & de Moura, R. O. (2022). Dynamic  
564 Cross-Correlation Matrix (DCCM) Reveals New Insights to Discover New NLRP3 Inhibitors  
565 Useful as Anti-Inflammatory Drugs. *Medical Sciences Forum*, 14(1), Article 1.  
566 <https://doi.org/10.3390/ECMC2022-13306>

567 Du, X., Li, Y., Xia, Y.-L., Ai, S.-M., Liang, J., Sang, P., Ji, X.-L., & Liu, S.-Q. (2016). Insights into  
568 Protein–Ligand Interactions: Mechanisms, Models, and Methods. *International Journal of*  
569 *Molecular Sciences*, 17(2), 144. <https://doi.org/10.3390/ijms17020144>

570 Du, X., Wang, X., & Geng, M. (2018). Alzheimer’s disease hypothesis and related therapies.  
571 *Translational Neurodegeneration*, 7(1), 2. <https://doi.org/10.1186/s40035-018-0107-y>

572 Gleeson, M. P., Hersey, A., & Hannongbua, S. (n.d.). In-Silico ADME Models: A General  
573 Assessment of their Utility in Drug Discovery Applications. *Current Topics in Medicinal*  
574 *Chemistry*, 11(4), 358–381.

575 Golriz Khatami, S., Robinson, C., Birkenbihl, C., Domingo-Fernández, D., Hoyt, C. T., &  
576 Hofmann-Apitius, M. (2020). Challenges of Integrative Disease Modeling in Alzheimer’s Disease.  
577 *Frontiers in Molecular Biosciences*, 6, 158. <https://doi.org/10.3389/fmolb.2019.00158>

578 Hefti, F. F. (2008). Requirements for a lead compound to become a clinical candidate. *BMC*  
579 *Neuroscience*, 9(Suppl 3), S7. <https://doi.org/10.1186/1471-2202-9-S3-S7>

580 Kim, J., Lee, H. J., & Lee, K. W. (2010). Naturally occurring phytochemicals for the prevention  
581 of Alzheimer’s disease. *Journal of Neurochemistry*, 112(6), 1415–1430.  
582 <https://doi.org/10.1111/j.1471-4159.2009.06562.x>

583 Kuntz, I. D. (1992). Structure-Based Strategies for Drug Design and Discovery. *Science*,  
584 257(5073), 1078–1082. <https://doi.org/10.1126/science.257.5073.1078>

585 Lagadic-Gossman, D., Rissel, M., Le Bot, M. A., & Guillouzo, A. (1998). Toxic Effects of Tacrine  
586 on Primary Hepatocytes and Liver Epithelial Cells in Culture. *Cell Biology and Toxicology*, 14(5),  
587 361–373. <https://doi.org/10.1023/A:1007589808761>

588 Lemkul, J. A., & Bevan, D. R. (2012). The Role of Molecular Simulations in the Development of  
589 Inhibitors of Amyloid  $\beta$ -Peptide Aggregation for the Treatment of Alzheimer’s Disease. *ACS*  
590 *Chemical Neuroscience*, 3(11), 845–856. <https://doi.org/10.1021/cn300091a>

591 Lopa, S. S., Al-Amin, Md. Y., Hasan, Md. K., Ahammed, Md. S., Islam, K. M., Alam, A. H. M.  
592 K., Tanaka, T., & Sadik, Md. G. (2021). Phytochemical Analysis and Cholinesterase Inhibitory and  
593 Antioxidant Activities of *Enhydra fluctuans* Relevant in the Management of Alzheimer's Disease.  
594 *International Journal of Food Science*, 2021, 8862025. <https://doi.org/10.1155/2021/8862025>

595 Malik, A., Iqbal, M. N., Ashraf, S., Khan, M. S., Shahzadi, S., Shafique, M. F., Sajid, Z., Sajid, M.,  
596 & Sehgal, S. A. (2023). In silico elucidation of potential drug targets against oxygenase domain of  
597 Human eNOS Dysfunction. *PLOS ONE*, 18(4), e0284993.  
598 <https://doi.org/10.1371/journal.pone.0284993>

599 Meng, X.-Y., Zhang, H.-X., Mezei, M., & Cui, M. (2011). Molecular Docking: A powerful  
600 approach for structure-based drug discovery. *Current Computer-Aided Drug Design*, 7(2), 146–  
601 157.

602 Motebennur, S. L., Nandeshwarappa, B. P., & Katagi, M. S. (2023). Drug Candidates for the  
603 Treatment of Alzheimer's Disease: New Findings from 2021 and 2022. *Drugs and Drug*  
604 *Candidates*, 2(3), Article 3. <https://doi.org/10.3390/ddc2030030>

605 Olin, J., & Schneider, L. (2002). Galantamine for Alzheimer's disease. *The Cochrane Database of*  
606 *Systematic Reviews*, 3, CD001747. <https://doi.org/10.1002/14651858.CD001747>

607 Onor, M. L., Trevisiol, M., & Aguglia, E. (2007). Rivastigmine in the treatment of Alzheimer's  
608 disease: An update. *Clinical Interventions in Aging*, 2(1), 17–32.  
609 <https://doi.org/10.2147/ciia.2007.2.1.17>

610 Pilger, C., Bartolucci, C., Lamba, D., Tropsha, A., & Fels, G. (2001). Accurate prediction of the  
611 bound conformation of galanthamine in the active site of *torpedo californica* acetylcholinesterase  
612 using molecular docking<sup>11</sup>Color Plates for this article are on pages 374–378. *Journal of Molecular*  
613 *Graphics and Modelling*, 19(3), 288–296. [https://doi.org/10.1016/S1093-3263\(00\)00056-5](https://doi.org/10.1016/S1093-3263(00)00056-5)

614 Rathod, S., Shinde, K., Porlekar, J., Choudhari, P., Dhavale, R., Mahuli, D., Tamboli, Y., Bhatia,  
615 M., Haval, K. P., Al-Sehemi, A. G., & Pannipara, M. (2023). Computational Exploration of Anti-  
616 cancer Potential of Flavonoids against Cyclin-Dependent Kinase 8: An *In Silico* Molecular  
617 Docking and Dynamic Approach. *ACS Omega*, 8(1), 391–409.  
618 <https://doi.org/10.1021/acsomega.2c04837>

619 Roberson, M. R., & Harrell, L. E. (1997). Cholinergic activity and amyloid precursor protein  
620 metabolism. *Brain Research. Brain Research Reviews*, 25(1), 50–69.  
621 [https://doi.org/10.1016/s0165-0173\(97\)00016-7](https://doi.org/10.1016/s0165-0173(97)00016-7)

622 Santos, T. C. dos, Gomes, T. M., Pinto, B. A. S., Camara, A. L., & Paes, A. M. de A. (2018).  
623 Naturally Occurring Acetylcholinesterase Inhibitors and Their Potential Use for Alzheimer's  
624 Disease Therapy. *Frontiers in Pharmacology*, 9.  
625 <https://www.frontiersin.org/journals/pharmacology/articles/10.3389/fphar.2018.01192>

626 Sarkar, B., Alam, S., Rajib, T. K., Islam, S. S., Araf, Y., & Ullah, Md. A. (2021). Identification of  
627 the most potent acetylcholinesterase inhibitors from plants for possible treatment of Alzheimer's  
628 disease: A computational approach. *Egyptian Journal of Medical Human Genetics*, 22(1), 10.  
629 <https://doi.org/10.1186/s43042-020-00127-8>

630 Scheltens, P., Strooper, B. D., Kivipelto, M., Holstege, H., Ch  telat, G., Teunissen, C. E.,  
631 Cummings, J., & Flier, W. M. van der. (2021). Alzheimer's disease. *The Lancet*, 397(10284),  
632 1577–1590. [https://doi.org/10.1016/S0140-6736\(20\)32205-4](https://doi.org/10.1016/S0140-6736(20)32205-4)

633 Siddiqui, M. R., AlOthman, Z. A., & Rahman, N. (2017). Analytical techniques in pharmaceutical  
634 analysis: A review. *Arabian Journal of Chemistry*, 10, S1409–S1421.  
635 <https://doi.org/10.1016/j.arabjc.2013.04.016>

636 Sobolev, O. V., Afonine, P. V., Moriarty, N. W., Hekkelman, M. L., Joosten, R. P., Perrakis, A., &  
637 Adams, P. D. (2020). A Global Ramachandran Score Identifies Protein Structures with Unlikely  
638 Stereochemistry. *Structure*, 28(11), 1249-1258.e2. <https://doi.org/10.1016/j.str.2020.08.005>

639 Taqui, R., Debnath, M., Ahmed, S., & Ghosh, A. (2022). Advances on plant extracts and  
640 phytocompounds with acetylcholinesterase inhibition activity for possible treatment of  
641 Alzheimer's disease. *Phytomedicine Plus*, 2(1), 100184.  
642 <https://doi.org/10.1016/j.phyplu.2021.100184>

643 Tayeb, H. O., Yang, H. D., Price, B. H., & Tarazi, F. I. (2012). Pharmacotherapies for Alzheimer's  
644 disease: Beyond cholinesterase inhibitors. *Pharmacology & Therapeutics*, 134(1), 8–25.  
645 <https://doi.org/10.1016/j.pharmthera.2011.12.002>



646 Wiltgen, M. (2019). Algorithms for Structure Comparison and Analysis: Homology Modelling of  
647 Proteins. In S. Ranganathan, M. Gribskov, K. Nakai, & C. Schönbach (Eds.), *Encyclopedia of*  
648 *Bioinformatics and Computational Biology* (pp. 38–61). Academic Press.  
649 <https://doi.org/10.1016/B978-0-12-809633-8.20484-6>

650

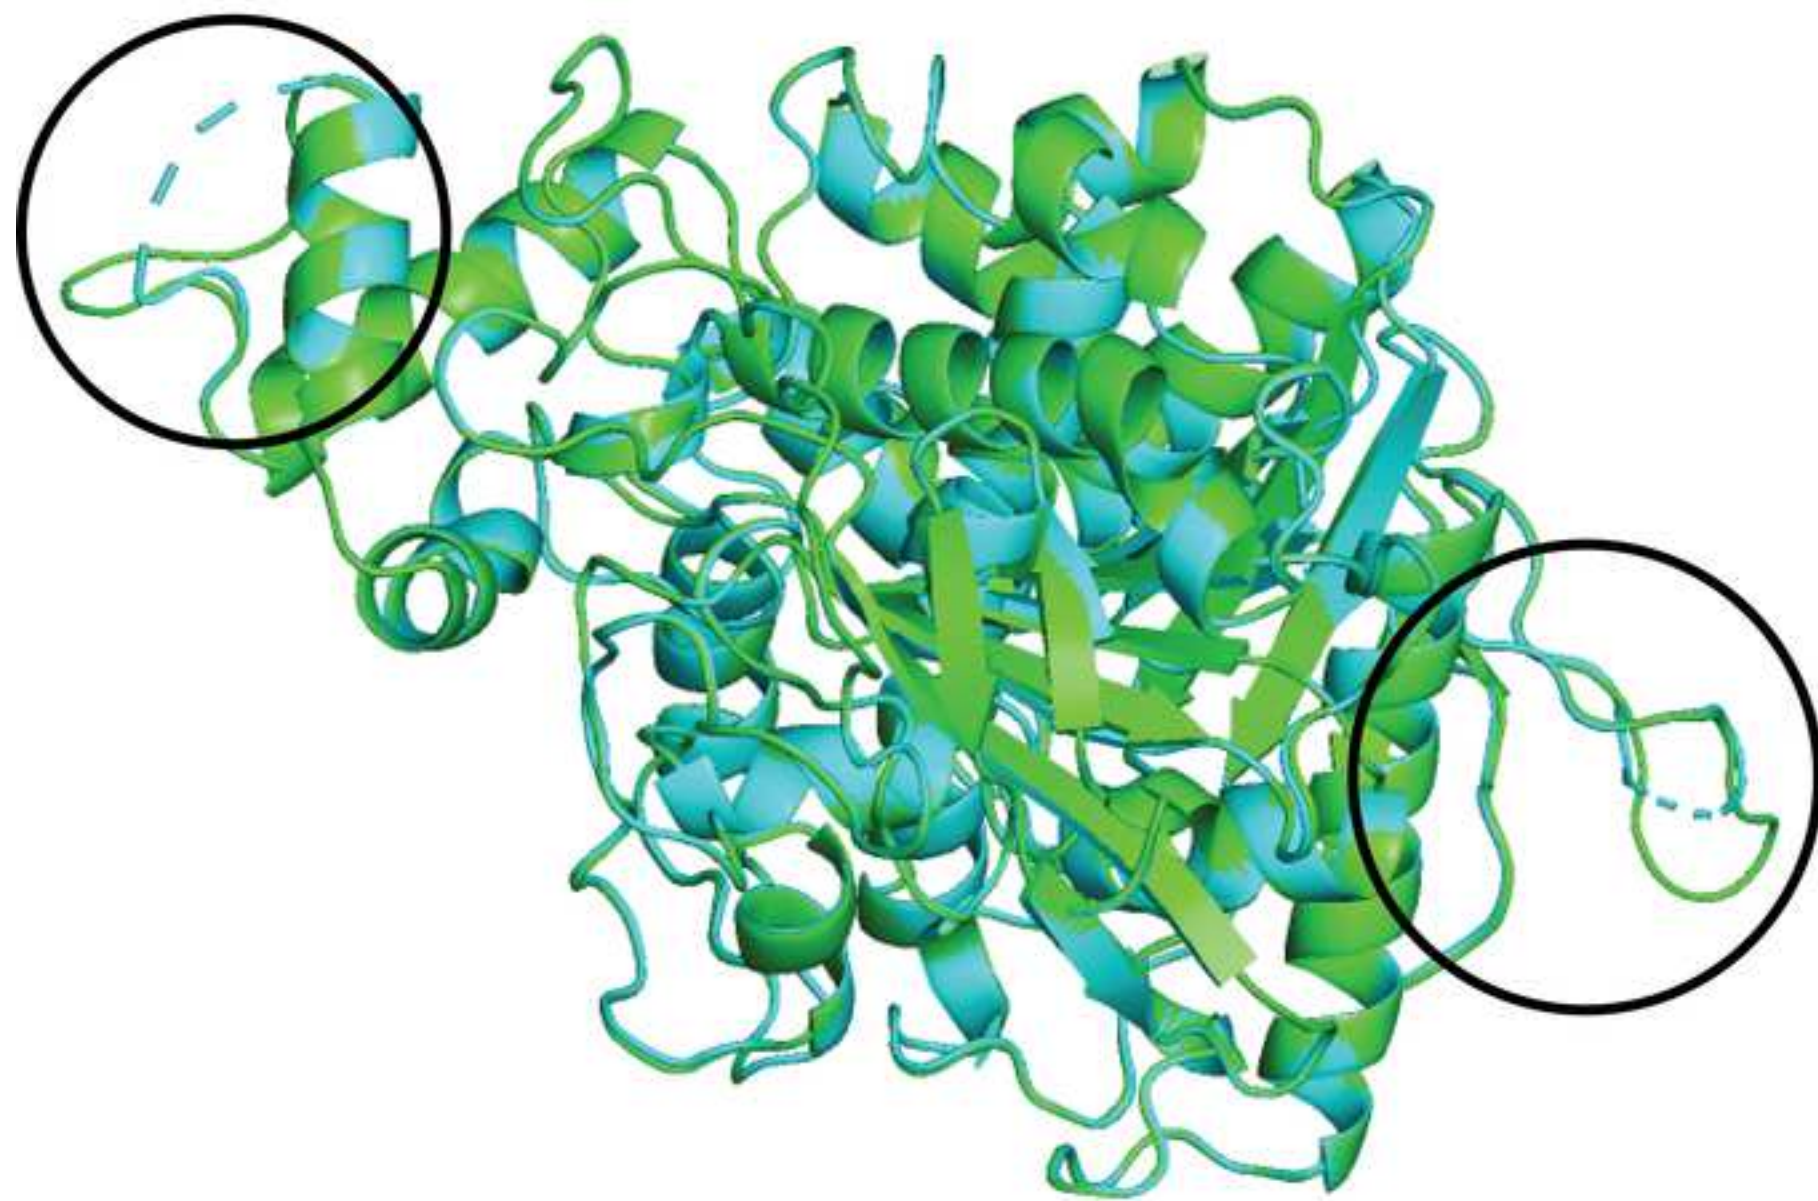

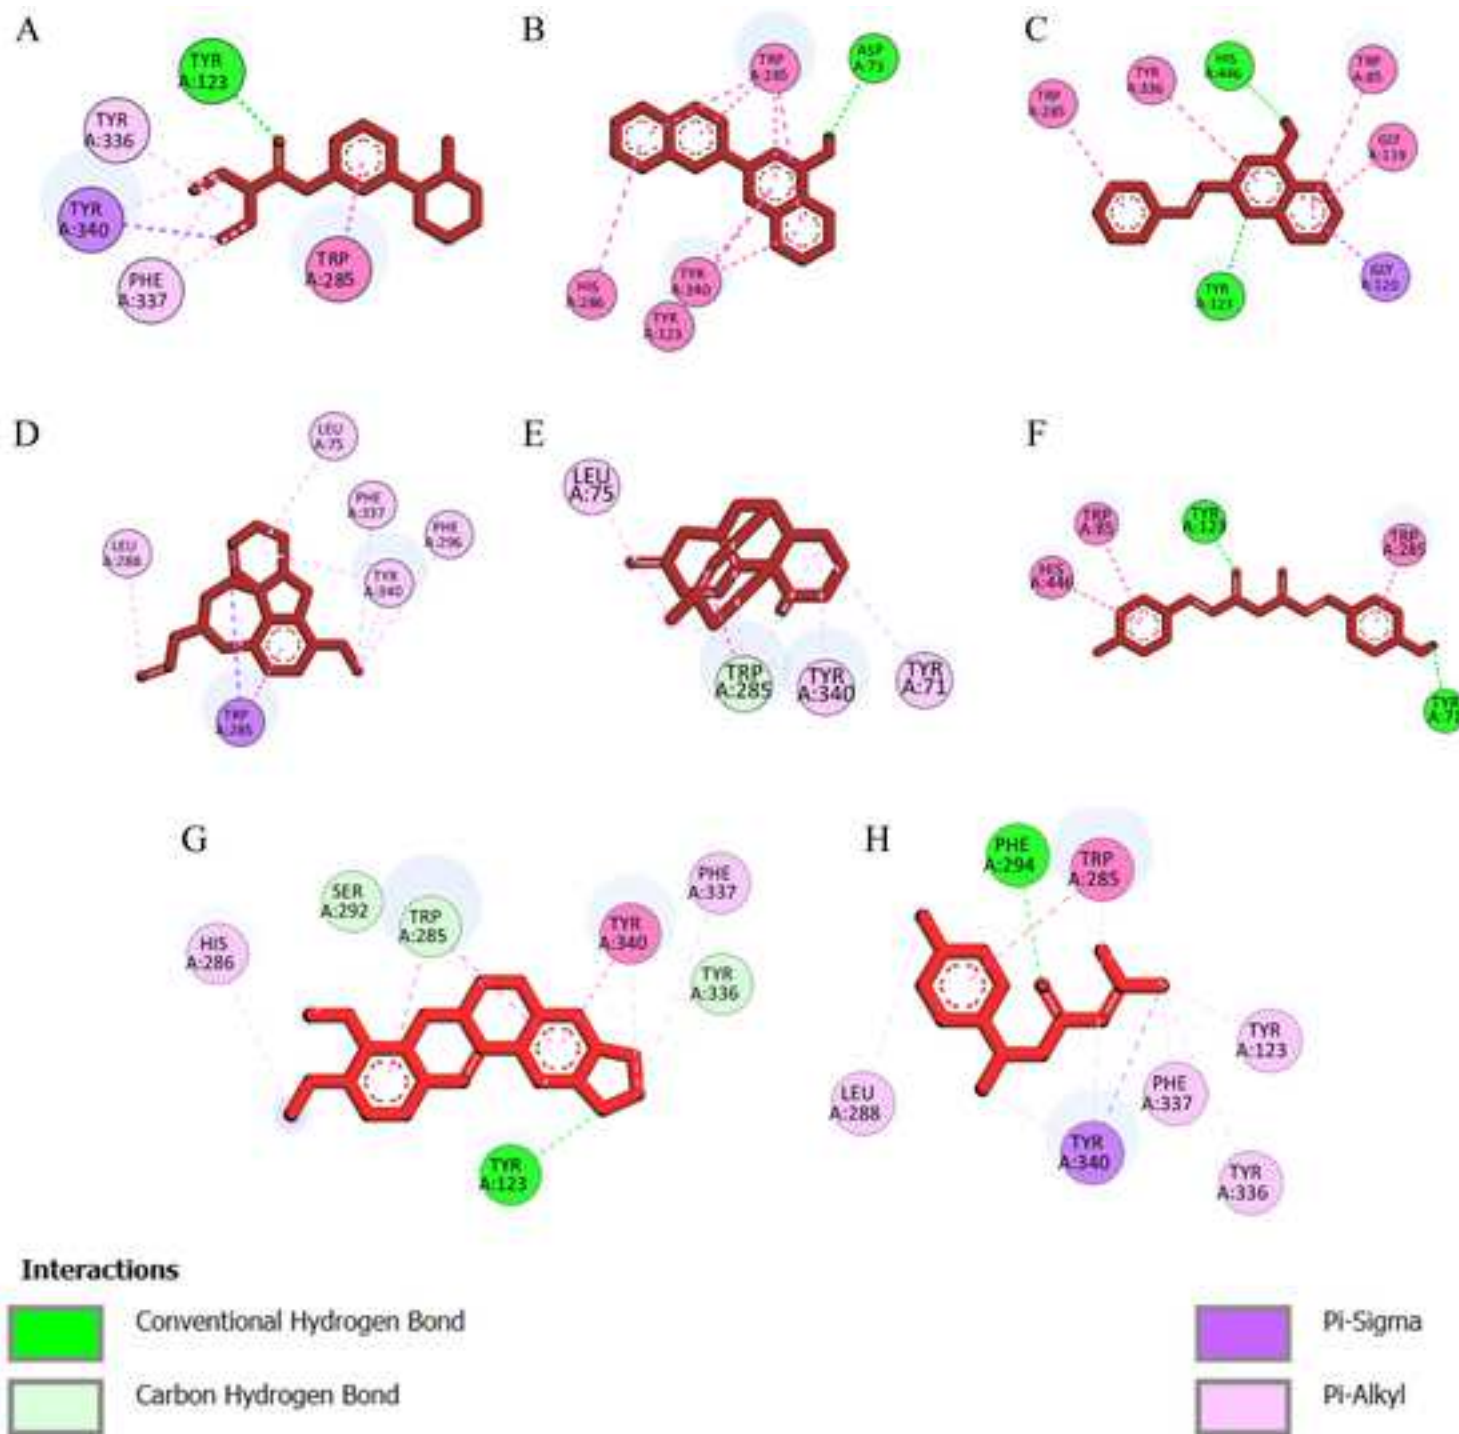

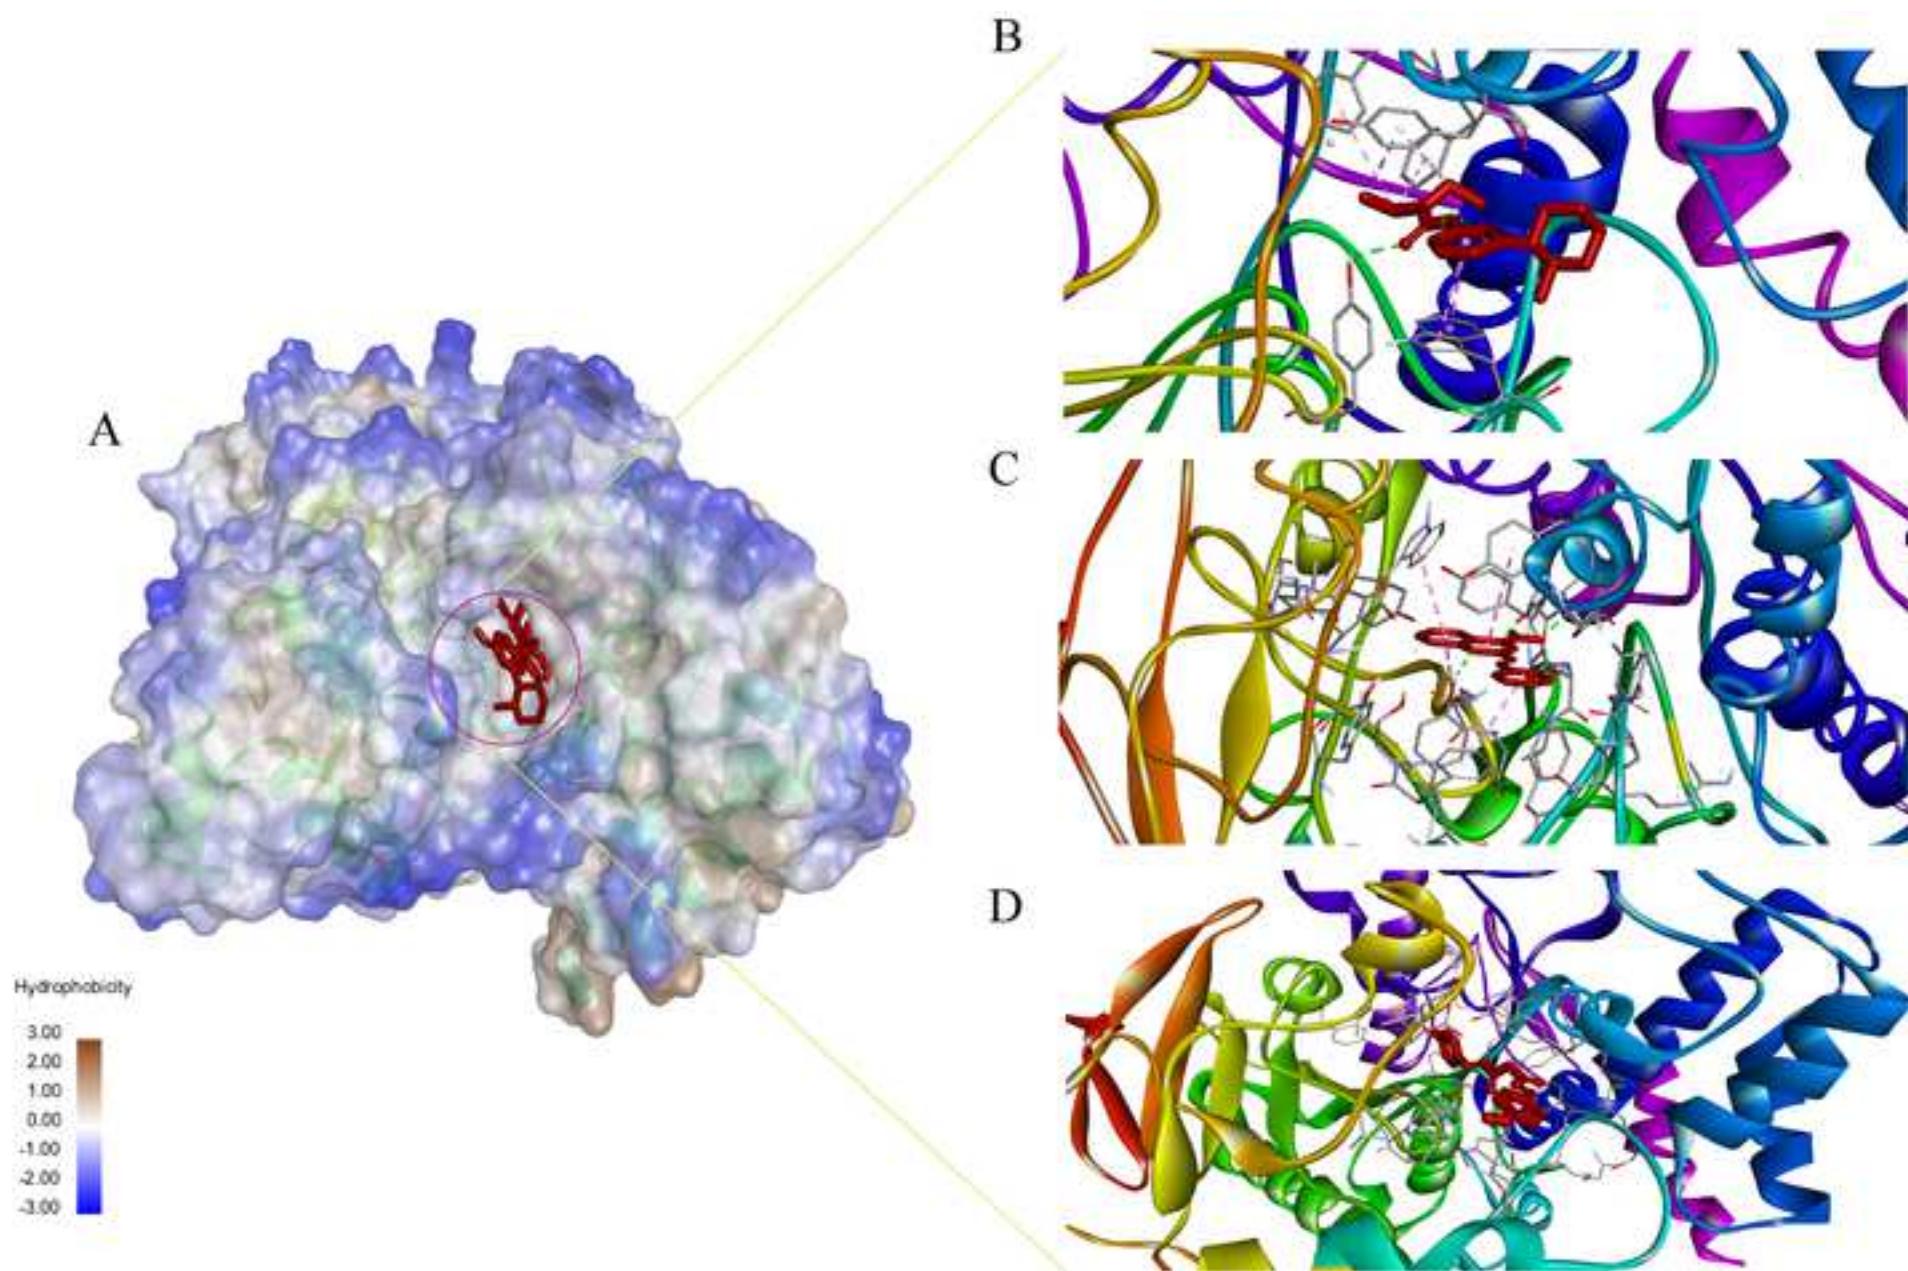

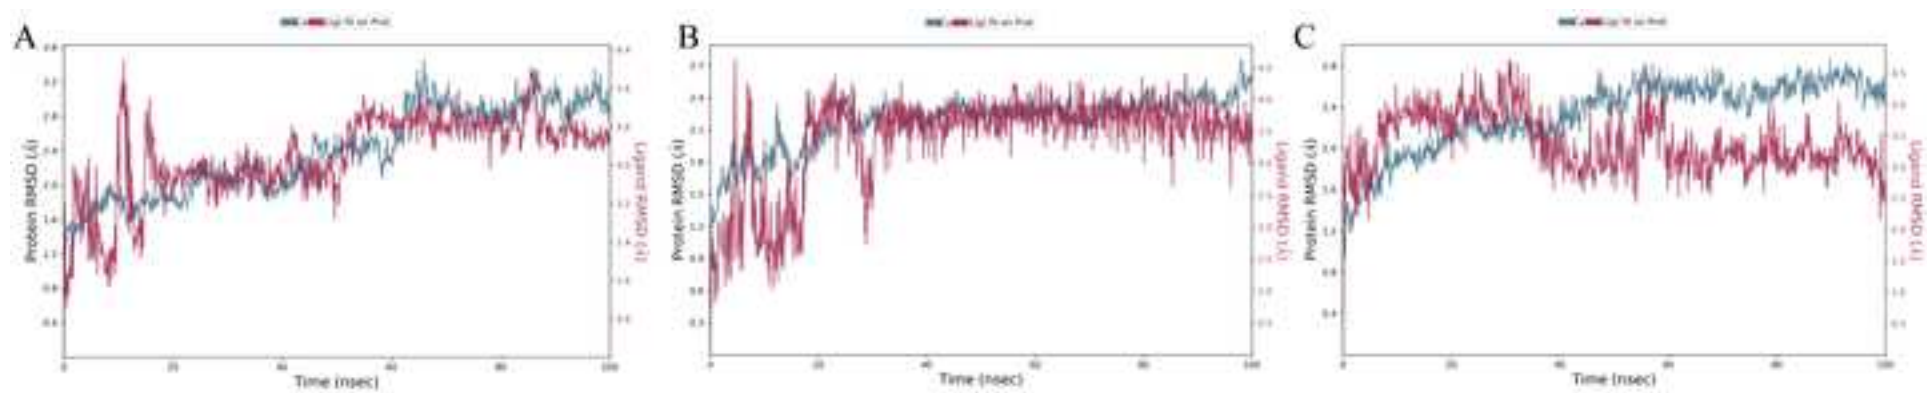

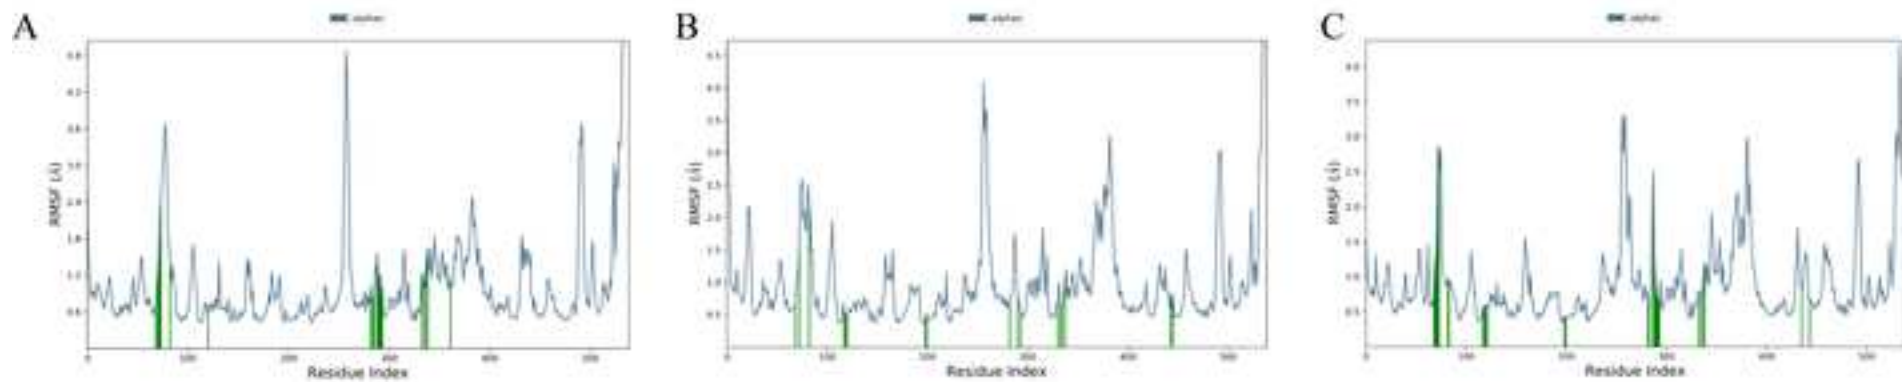

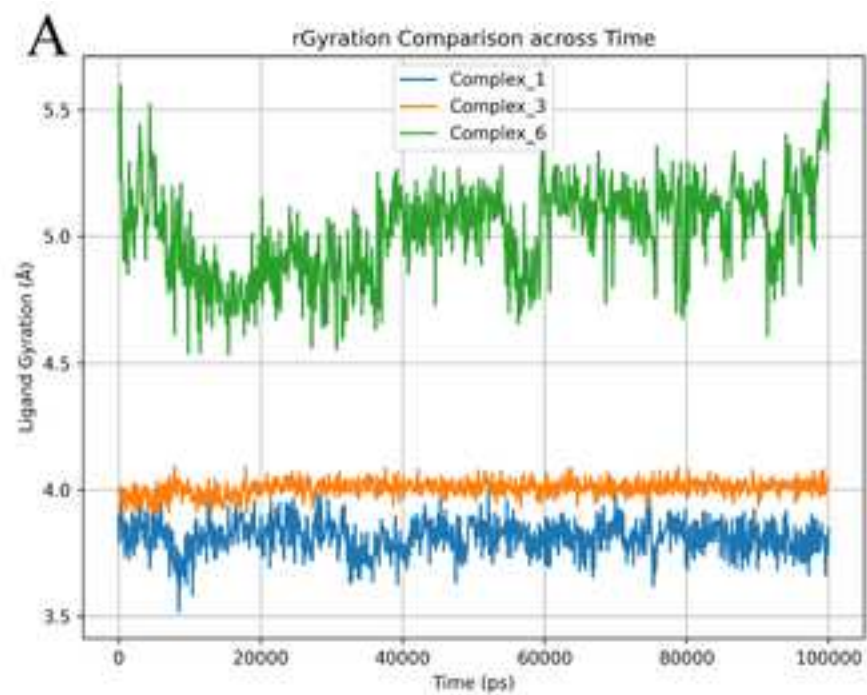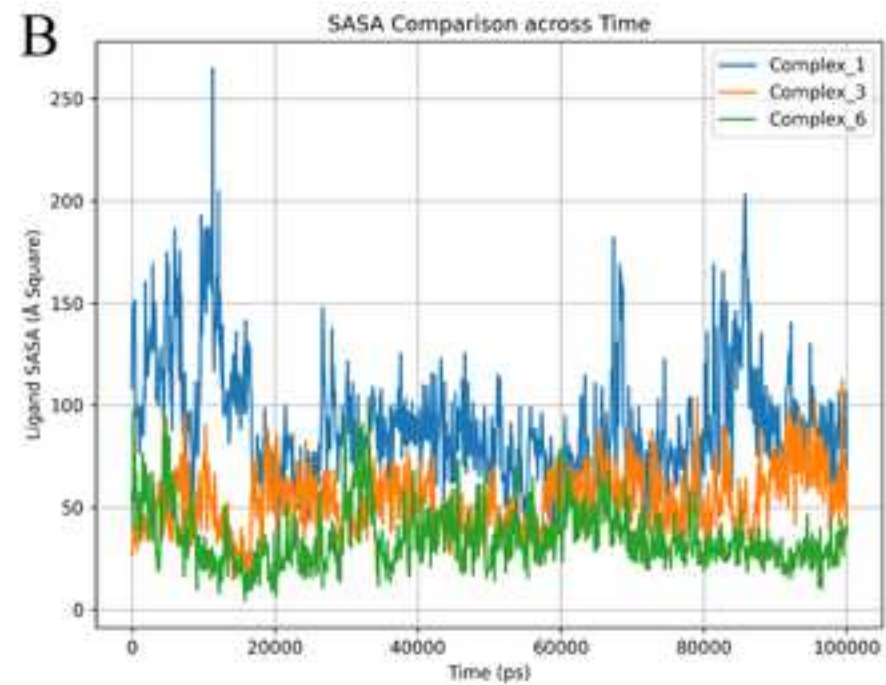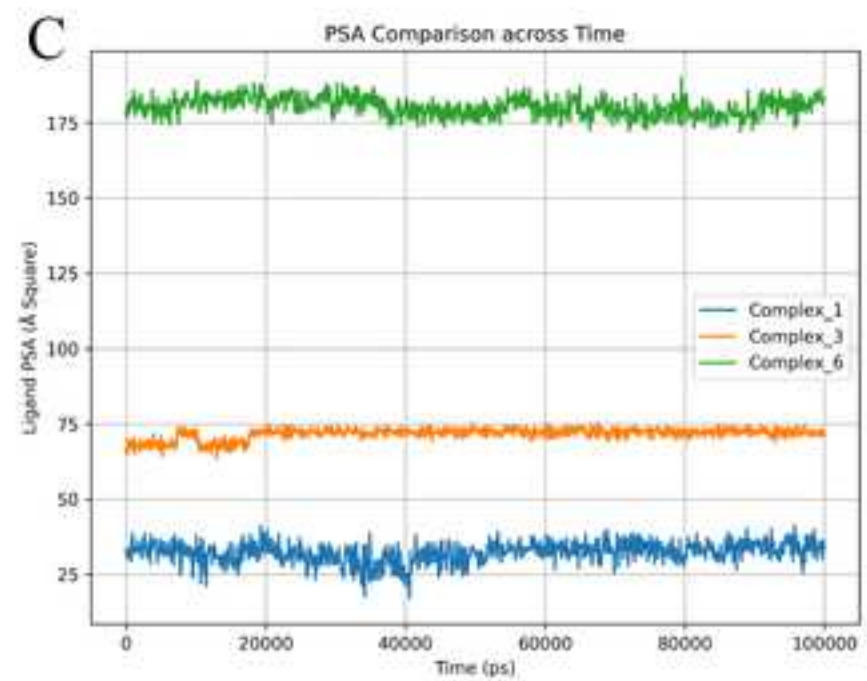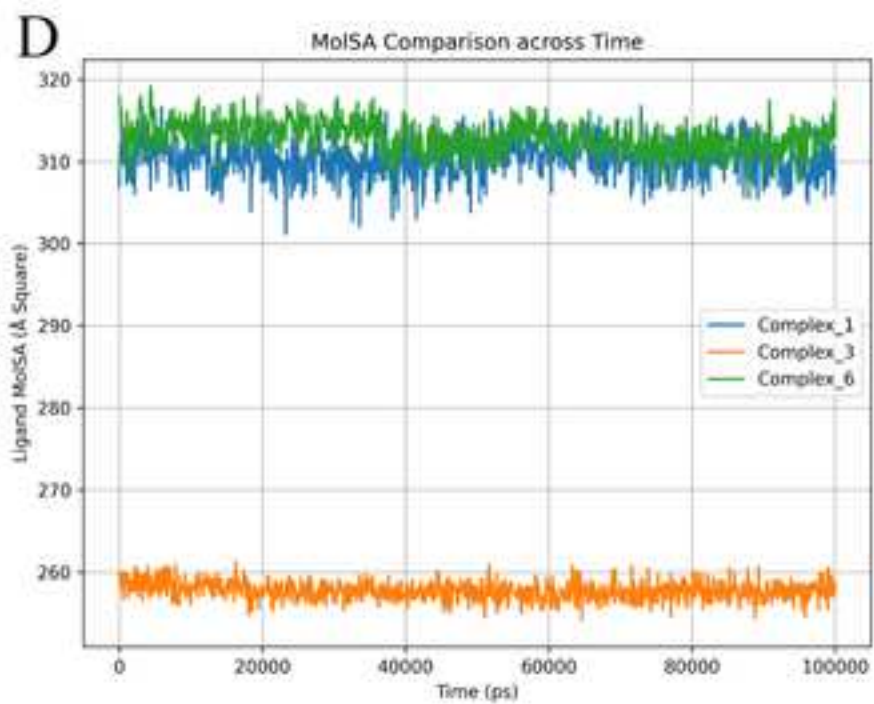

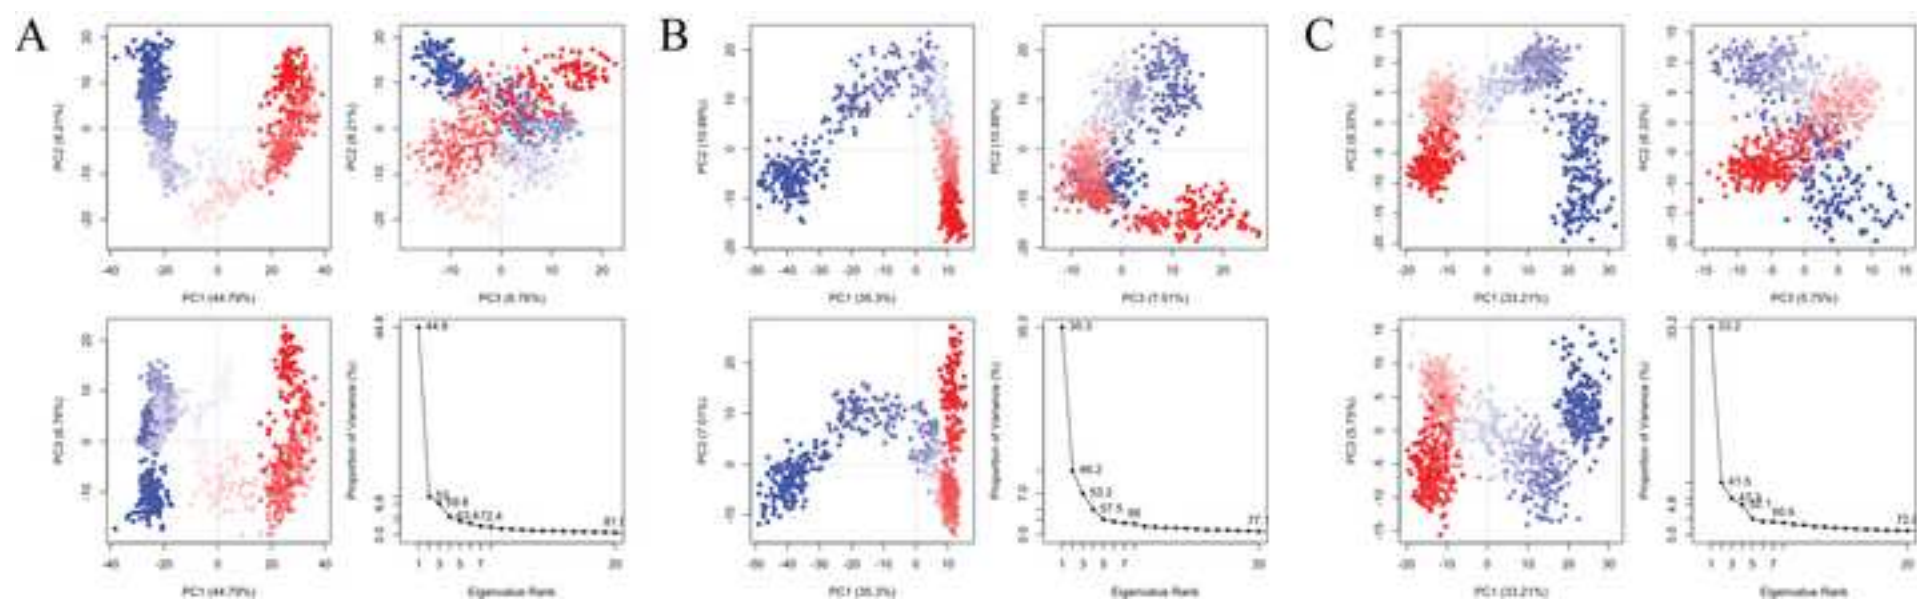



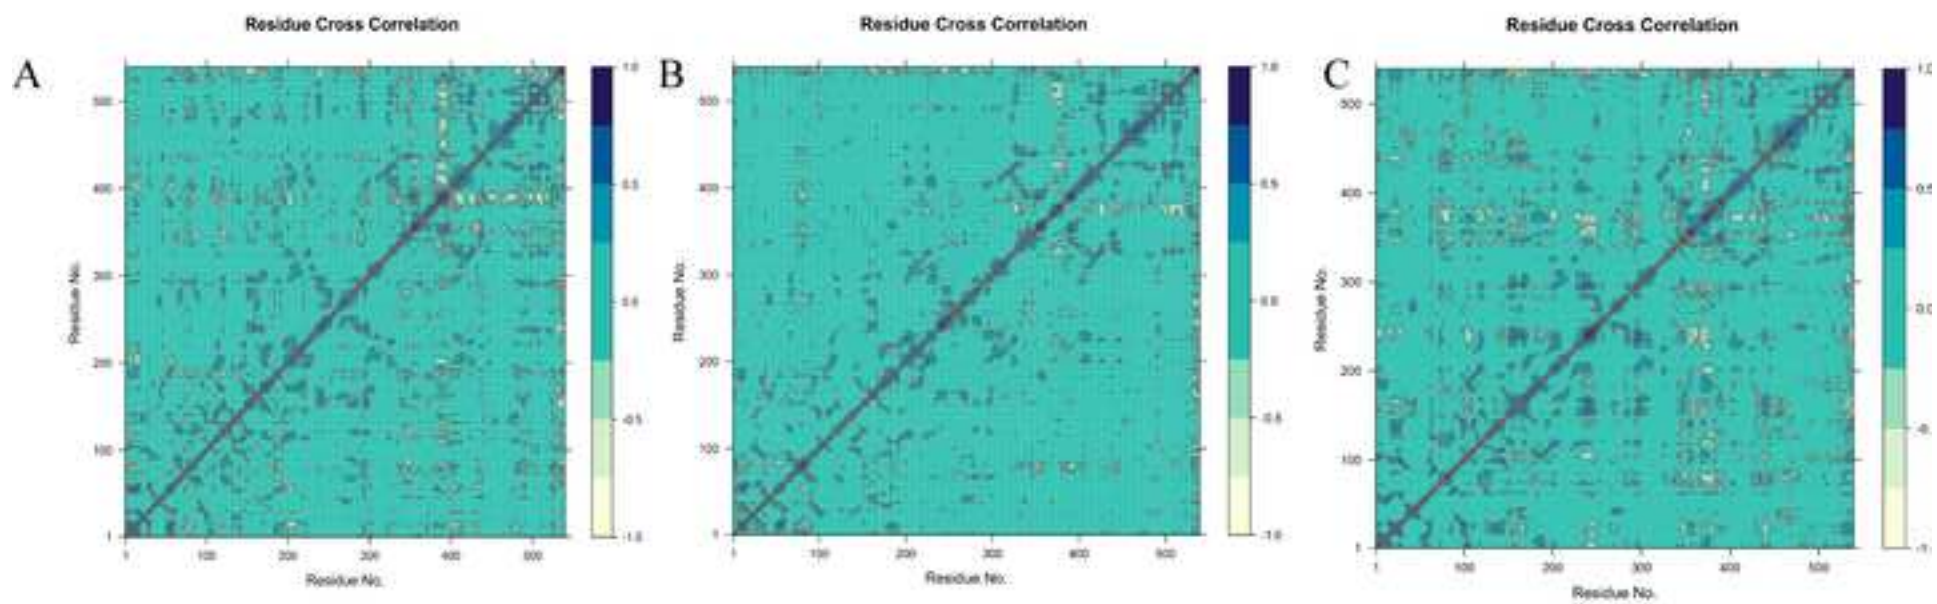

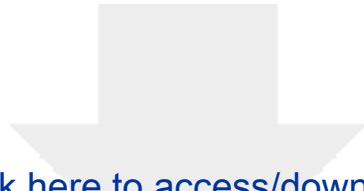

Click here to access/download  
**Supporting Information**  
Supplementary Information.pdf

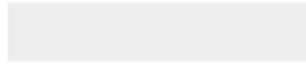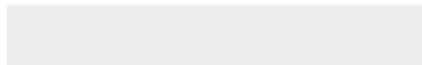

Supplement: pone.0304490.s013.pdf [file pone.0304490.s013.pdf]
